# Supplementary material for: CoNet: Efficient Network Regression for Survival Analysis in Transcriptome-Wide Association Studies—With Applications to Studies of Breast Cancer
Source: MDPI journal article supplement (doi:10.3390/genes14030586), 2023-02-25
Supplement: s1 [file s1]

**Table S1.** The type I error for detecting the effect of the node on the survival phenotype under three scenarios where the effecting node is pre-specified (n=10000), with DPR as the gene expression prediction model in TWAS. Simulations were conducted with four different between-node correlation patterns (the recombination of quadratic and sine, sine, quadratic, and linear) and three different censoring rates (0.1, 0.3, and 0.5).

| Scenario 1 :Only node changes                                       |         |                |       |       |
|---------------------------------------------------------------------|---------|----------------|-------|-------|
| Correlation patterns                                                | Methods | Censoring rate |       |       |
|                                                                     |         | 0.1            | 0.3   | 0.5   |
| $x_k = 0.5x_l$                                                      | CoNet   | 0.047          | 0.052 | 0.057 |
|                                                                     | CPNT    | 0.051          | 0.054 | 0.053 |
| $x_k = 0.1x_l^2$                                                    | CoNet   | 0.045          | 0.050 | 0.062 |
|                                                                     | CPNT    | 0.048          | 0.052 | 0.057 |
| $x_k = \sin x_l$                                                    | CoNet   | 0.043          | 0.050 | 0.059 |
|                                                                     | CPNT    | 0.048          | 0.053 | 0.058 |
| $x_k = \sin^2 x_l$                                                  | CoNet   | 0.042          | 0.050 | 0.061 |
|                                                                     | CPNT    | 0.047          | 0.052 | 0.057 |
| Scenario 2 : Both node and edge change with node hanging on edge    |         |                |       |       |
| Correlation patterns                                                | Methods | Censoring rate |       |       |
|                                                                     |         | 0.1            | 0.3   | 0.5   |
| $x_k = 0.5x_l$                                                      | CoNet   | 0.045          | 0.043 | 0.045 |
|                                                                     | CPNT    | 0.045          | 0.047 | 0.041 |
| $x_k = 0.1x_l^2$                                                    | CoNet   | 0.055          | 0.057 | 0.047 |
|                                                                     | CPNT    | 0.050          | 0.051 | 0.046 |
| $x_k = \sin x_l$                                                    | CoNet   | 0.036          | 0.051 | 0.046 |
|                                                                     | CPNT    | 0.036          | 0.046 | 0.045 |
| $x_k = \sin^2 x_l$                                                  | CoNet   | 0.044          | 0.051 | 0.049 |
|                                                                     | CPNT    | 0.046          | 0.054 | 0.052 |
| Scenario 3: Both node and edge change with node not hanging on edge |         |                |       |       |
| Correlation patterns                                                | Methods | Censoring rate |       |       |
|                                                                     |         | 0.1            | 0.3   | 0.5   |
| $x_k = 0.5x_l$                                                      | CoNet   | 0.048          | 0.048 | 0.046 |
|                                                                     | CPNT    | 0.054          | 0.052 | 0.045 |
| $x_k = 0.1x_l^2$                                                    | CoNet   | 0.055          | 0.054 | 0.059 |
|                                                                     | CPNT    | 0.054          | 0.050 | 0.055 |
| $x_k = \sin x_l$                                                    | CoNet   | 0.054          | 0.053 | 0.057 |
|                                                                     | CPNT    | 0.055          | 0.048 | 0.053 |
| $x_k = \sin^2 x_l$                                                  | CoNet   | 0.054          | 0.053 | 0.057 |
|                                                                     | CPNT    | 0.056          | 0.050 | 0.054 |

**Table S2.** The type I error for detecting the effect of the node on the survival phenotype under three scenarios where the effecting node is pre-specified (n=20000), with DPR as the gene expression prediction model in TWAS. Simulations were conducted with four different between-node correlation patterns (the recombination of quadratic and sine, sine, quadratic, and linear) and three different censoring rates (0.1, 0.3, and 0.5).

| Scenario 1 :Only node changes                                       |         |                |       |       |
|---------------------------------------------------------------------|---------|----------------|-------|-------|
| Correlation patterns                                                | Methods | Censoring rate |       |       |
|                                                                     |         | 0.1            | 0.3   | 0.5   |
| $x_k = 0.5x_l$                                                      | CoNet   | 0.051          | 0.055 | 0.048 |
|                                                                     | CPNT    | 0.048          | 0.055 | 0.043 |
| $x_k = 0.1x_l^2$                                                    | CoNet   | 0.056          | 0.059 | 0.052 |
|                                                                     | CPNT    | 0.043          | 0.056 | 0.054 |
| $x_k = \sin x_l$                                                    | CoNet   | 0.057          | 0.057 | 0.051 |
|                                                                     | CPNT    | 0.054          | 0.055 | 0.055 |
| $x_k = \sin^2 x_l$                                                  | CoNet   | 0.055          | 0.057 | 0.053 |
|                                                                     | CPNT    | 0.054          | 0.056 | 0.054 |
| Scenario 2 : Both node and edge change with node hanging on edge    |         |                |       |       |
| Correlation patterns                                                | Methods | Censoring rate |       |       |
|                                                                     |         | 0.1            | 0.3   | 0.5   |
| $x_k = 0.5x_l$                                                      | CoNet   | 0.049          | 0.046 | 0.057 |
|                                                                     | CPNT    | 0.043          | 0.048 | 0.057 |
| $x_k = 0.1x_l^2$                                                    | CoNet   | 0.051          | 0.049 | 0.051 |
|                                                                     | CPNT    | 0.055          | 0.057 | 0.050 |
| $x_k = \sin x_l$                                                    | CoNet   | 0.041          | 0.056 | 0.042 |
|                                                                     | CPNT    | 0.047          | 0.058 | 0.048 |
| $x_k = \sin^2 x_l$                                                  | CoNet   | 0.041          | 0.053 | 0.056 |
|                                                                     | CPNT    | 0.039          | 0.054 | 0.052 |
| Scenario 3: Both node and edge change with node not hanging on edge |         |                |       |       |
| Correlation patterns                                                | Methods | Censoring rate |       |       |
|                                                                     |         | 0.1            | 0.3   | 0.5   |
| $x_k = 0.5x_l$                                                      | CoNet   | 0.054          | 0.060 | 0.051 |
|                                                                     | CPNT    | 0.062          | 0.059 | 0.050 |
| $x_k = 0.1x_l^2$                                                    | CoNet   | 0.065          | 0.055 | 0.061 |
|                                                                     | CPNT    | 0.065          | 0.054 | 0.061 |
| $x_k = \sin x_l$                                                    | CoNet   | 0.050          | 0.053 | 0.055 |
|                                                                     | CPNT    | 0.052          | 0.052 | 0.053 |
| $x_k = \sin^2 x_l$                                                  | CoNet   | 0.049          | 0.053 | 0.053 |
|                                                                     | CPNT    | 0.051          | 0.054 | 0.054 |

**Table S3.** The type I error for detecting the effect of the edge on the survival phenotype under three scenarios where the effecting edge is pre-specified (n=10000), with DPR as the gene expression prediction model in TWAS. Simulations were conducted with four different between-node correlation patterns (the recombination of quadratic and sine, sine, quadratic, and linear) and three different censoring rates (0.1, 0.3, and 0.5).

| Scenario 1 :Only edge changes                                       |         |                |       |       |
|---------------------------------------------------------------------|---------|----------------|-------|-------|
| Correlation patterns                                                | Methods | Censoring rate |       |       |
|                                                                     |         | 0.1            | 0.3   | 0.5   |
| $x_k = 0.5x_l$                                                      | CoNet   | 0.040          | 0.040 | 0.030 |
|                                                                     | CPNT    | 0.047          | 0.046 | 0.048 |
| $x_k = 0.1x_l^2$                                                    | CoNet   | 0.059          | 0.049 | 0.046 |
|                                                                     | CPNT    | 0.068          | 0.061 | 0.061 |
| $x_k = \sin x_l$                                                    | CoNet   | 0.035          | 0.052 | 0.052 |
|                                                                     | CPNT    | 0.054          | 0.055 | 0.048 |
| $x_k = \sin^2 x_l$                                                  | CoNet   | 0.062          | 0.058 | 0.069 |
|                                                                     | CPNT    | 0.054          | 0.049 | 0.053 |
| Scenario 2 : Both node and edge change with node hanging on edge    |         |                |       |       |
| Correlation patterns                                                | Methods | Censoring rate |       |       |
|                                                                     |         | 0.1            | 0.3   | 0.5   |
| $x_k = 0.5x_l$                                                      | CoNet   | 0.063          | 0.060 | 0.065 |
|                                                                     | CPNT    | 0.056          | 0.062 | 0.049 |
| $x_k = 0.1x_l^2$                                                    | CoNet   | 0.043          | 0.047 | 0.047 |
|                                                                     | CPNT    | 0.052          | 0.049 | 0.035 |
| $x_k = \sin x_l$                                                    | CoNet   | 0.040          | 0.046 | 0.055 |
|                                                                     | CPNT    | 0.050          | 0.045 | 0.060 |
| $x_k = \sin^2 x_l$                                                  | CoNet   | 0.042          | 0.040 | 0.041 |
|                                                                     | CPNT    | 0.043          | 0.033 | 0.054 |
| Scenario 3: Both node and edge change with node not hanging on edge |         |                |       |       |
| Correlation patterns                                                | Methods | Censoring rate |       |       |
|                                                                     |         | 0.1            | 0.3   | 0.5   |
| $x_k = 0.5x_l$                                                      | CoNet   | 0.054          | 0.065 | 0.059 |
|                                                                     | CPNT    | 0.052          | 0.055 | 0.059 |
| $x_k = 0.1x_l^2$                                                    | CoNet   | 0.043          | 0.047 | 0.047 |
|                                                                     | CPNT    | 0.052          | 0.055 | 0.048 |
| $x_k = \sin x_l$                                                    | CoNet   | 0.041          | 0.048 | 0.055 |
|                                                                     | CPNT    | 0.049          | 0.056 | 0.060 |
| $x_k = \sin^2 x_l$                                                  | CoNet   | 0.043          | 0.038 | 0.041 |
|                                                                     | CPNT    | 0.048          | 0.051 | 0.054 |

**Table S4.** The type I error for detecting the effect of the edge on the survival phenotype under three scenarios where the effecting edge is pre-specified (n=20000), with DPR as the gene expression prediction model in TWAS. Simulations were conducted with four different between-node correlation patterns (the recombination of quadratic and sine, sine, quadratic, and linear) and three different censoring rates (0.1, 0.3, and 0.5).

| <b>Scenario 1 :Only edge changes</b>                                       |         |                |       |       |
|----------------------------------------------------------------------------|---------|----------------|-------|-------|
| Correlation patterns                                                       | Methods | Censoring rate |       |       |
|                                                                            |         | 0.1            | 0.3   | 0.5   |
| $x_k = 0.5x_l$                                                             | CoNet   | 0.052          | 0.053 | 0.060 |
|                                                                            | CPNT    | 0.062          | 0.060 | 0.064 |
| $x_k = 0.1x_l^2$                                                           | CoNet   | 0.037          | 0.049 | 0.048 |
|                                                                            | CPNT    | 0.058          | 0.051 | 0.043 |
| $x_k = \sin x_l$                                                           | CoNet   | 0.044          | 0.054 | 0.049 |
|                                                                            | CPNT    | 0.047          | 0.053 | 0.039 |
| $x_k = \sin^2 x_l$                                                         | CoNet   | 0.046          | 0.049 | 0.045 |
|                                                                            | CPNT    | 0.056          | 0.049 | 0.043 |
| <b>Scenario 2 : Both node and edge change with node hanging on edge</b>    |         |                |       |       |
| Correlation patterns                                                       | Methods | Censoring rate |       |       |
|                                                                            |         | 0.1            | 0.3   | 0.5   |
| $x_k = 0.5x_l$                                                             | CoNet   | 0.059          | 0.045 | 0.046 |
|                                                                            | CPNT    | 0.053          | 0.056 | 0.050 |
| $x_k = 0.1x_l^2$                                                           | CoNet   | 0.050          | 0.054 | 0.057 |
|                                                                            | CPNT    | 0.054          | 0.059 | 0.062 |
| $x_k = \sin x_l$                                                           | CoNet   | 0.039          | 0.047 | 0.054 |
|                                                                            | CPNT    | 0.040          | 0.055 | 0.059 |
| $x_k = \sin^2 x_l$                                                         | CoNet   | 0.054          | 0.054 | 0.045 |
|                                                                            | CPNT    | 0.044          | 0.042 | 0.050 |
| <b>Scenario 3: Both node and edge change with node not hanging on edge</b> |         |                |       |       |
| Correlation patterns                                                       | Methods | Censoring rate |       |       |
|                                                                            |         | 0.1            | 0.3   | 0.5   |
| $x_k = 0.5x_l$                                                             | CoNet   | 0.057          | 0.053 | 0.056 |
|                                                                            | CPNT    | 0.063          | 0.056 | 0.053 |
| $x_k = 0.1x_l^2$                                                           | CoNet   | 0.043          | 0.045 | 0.047 |
|                                                                            | CPNT    | 0.056          | 0.046 | 0.053 |
| $x_k = \sin x_l$                                                           | CoNet   | 0.049          | 0.047 | 0.054 |
|                                                                            | CPNT    | 0.052          | 0.046 | 0.059 |
| $x_k = \sin^2 x_l$                                                         | CoNet   | 0.057          | 0.052 | 0.045 |
|                                                                            | CPNT    | 0.047          | 0.041 | 0.050 |

**Table S5.** The type I error for detecting the effect of the node on the survival phenotype under three scenarios where the effecting node is randomly selected (n=5000), with DPR as the gene expression prediction model in TWAS. Simulations were conducted with four different between-node correlation patterns (the recombination of quadratic and sine, sine, quadratic, and linear) and three different censoring rates (0.1, 0.3, and 0.5).

| <b>Scenario 1 :Only node changes</b>                                       |         |                |       |       |
|----------------------------------------------------------------------------|---------|----------------|-------|-------|
| Correlation patterns                                                       | Methods | Censoring rate |       |       |
|                                                                            |         | 0.1            | 0.3   | 0.5   |
| $x_k = 0.5x_l$                                                             | CoNet   | 0.049          | 0.054 | 0.047 |
|                                                                            | CPNT    | 0.047          | 0.056 | 0.056 |
| $x_k = 0.1x_l^2$                                                           | CoNet   | 0.049          | 0.054 | 0.050 |
|                                                                            | CPNT    | 0.052          | 0.053 | 0.054 |
| $x_k = \sin x_l$                                                           | CoNet   | 0.047          | 0.055 | 0.048 |
|                                                                            | CPNT    | 0.051          | 0.056 | 0.053 |
| $x_k = \sin^2 x_l$                                                         | CoNet   | 0.046          | 0.052 | 0.048 |
|                                                                            | CPNT    | 0.052          | 0.053 | 0.054 |
| <b>Scenario 2 : Both node and edge change with node hanging on edge</b>    |         |                |       |       |
| Correlation patterns                                                       | Methods | Censoring rate |       |       |
|                                                                            |         | 0.1            | 0.3   | 0.5   |
| $x_k = 0.5x_l$                                                             | CoNet   | 0.041          | 0.047 | 0.043 |
|                                                                            | CPNT    | 0.040          | 0.048 | 0.030 |
| $x_k = 0.1x_l^2$                                                           | CoNet   | 0.058          | 0.060 | 0.058 |
|                                                                            | CPNT    | 0.057          | 0.066 | 0.055 |
| $x_k = \sin x_l$                                                           | CoNet   | 0.049          | 0.060 | 0.053 |
|                                                                            | CPNT    | 0.048          | 0.067 | 0.057 |
| $x_k = \sin^2 x_l$                                                         | CoNet   | 0.048          | 0.060 | 0.057 |
|                                                                            | CPNT    | 0.049          | 0.066 | 0.057 |
| <b>Scenario 3: Both node and edge change with node not hanging on edge</b> |         |                |       |       |
| Correlation patterns                                                       | Methods | Censoring rate |       |       |
|                                                                            |         | 0.1            | 0.3   | 0.5   |
| $x_k = 0.5x_l$                                                             | CoNet   | 0.065          | 0.058 | 0.046 |
|                                                                            | CPNT    | 0.064          | 0.059 | 0.049 |
| $x_k = 0.1x_l^2$                                                           | CoNet   | 0.038          | 0.048 | 0.044 |
|                                                                            | CPNT    | 0.032          | 0.036 | 0.043 |
| $x_k = \sin x_l$                                                           | CoNet   | 0.036          | 0.043 | 0.046 |
|                                                                            | CPNT    | 0.043          | 0.040 | 0.041 |
| $x_k = \sin^2 x_l$                                                         | CoNet   | 0.036          | 0.045 | 0.045 |
|                                                                            | CPNT    | 0.039          | 0.035 | 0.043 |

**Table S6.** The type I error for detecting the effect of the node on the survival phenotype under three scenarios where the effecting node is randomly selected (n=10000), with DPR as the gene expression prediction model in TWAS. Simulations were conducted with four different between-node correlation patterns (the recombination of quadratic and sine, sine, quadratic, and linear) and three different censoring rates (0.1, 0.3, and 0.5).

| <b>Scenario 1 :Only node changes</b>                                       |         |                |       |       |
|----------------------------------------------------------------------------|---------|----------------|-------|-------|
| Correlation patterns                                                       | Methods | Censoring rate |       |       |
|                                                                            |         | 0.1            | 0.3   | 0.5   |
| $x_k = 0.5x_l$                                                             | CoNet   | 0.036          | 0.047 | 0.054 |
|                                                                            | CPNT    | 0.035          | 0.051 | 0.064 |
| $x_k = 0.1x_l^2$                                                           | CoNet   | 0.031          | 0.042 | 0.040 |
|                                                                            | CPNT    | 0.037          | 0.045 | 0.041 |
| $x_k = \sin x_l$                                                           | CoNet   | 0.070          | 0.060 | 0.047 |
|                                                                            | CPNT    | 0.063          | 0.068 | 0.052 |
| $x_k = \sin^2 x_l$                                                         | CoNet   | 0.062          | 0.044 | 0.035 |
|                                                                            | CPNT    | 0.063          | 0.045 | 0.040 |
| <b>Scenario 2 : Both node and edge change with node hanging on edge</b>    |         |                |       |       |
| Correlation patterns                                                       | Methods | Censoring rate |       |       |
|                                                                            |         | 0.1            | 0.3   | 0.5   |
| $x_k = 0.5x_l$                                                             | CoNet   | 0.049          | 0.050 | 0.045 |
|                                                                            | CPNT    | 0.043          | 0.049 | 0.048 |
| $x_k = 0.1x_l^2$                                                           | CoNet   | 0.055          | 0.054 | 0.046 |
|                                                                            | CPNT    | 0.056          | 0.058 | 0.045 |
| $x_k = \sin x_l$                                                           | CoNet   | 0.050          | 0.057 | 0.047 |
|                                                                            | CPNT    | 0.049          | 0.052 | 0.045 |
| $x_k = \sin^2 x_l$                                                         | CoNet   | 0.049          | 0.056 | 0.051 |
|                                                                            | CPNT    | 0.049          | 0.056 | 0.045 |
| <b>Scenario 3: Both node and edge change with node not hanging on edge</b> |         |                |       |       |
| Correlation patterns                                                       | Methods | Censoring rate |       |       |
|                                                                            |         | 0.1            | 0.3   | 0.5   |
| $x_k = 0.5x_l$                                                             | CoNet   | 0.036          | 0.048 | 0.050 |
|                                                                            | CPNT    | 0.037          | 0.049 | 0.054 |
| $x_k = 0.1x_l^2$                                                           | CoNet   | 0.049          | 0.055 | 0.050 |
|                                                                            | CPNT    | 0.050          | 0.050 | 0.046 |
| $x_k = \sin x_l$                                                           | CoNet   | 0.034          | 0.047 | 0.054 |
|                                                                            | CPNT    | 0.031          | 0.040 | 0.050 |
| $x_k = \sin^2 x_l$                                                         | CoNet   | 0.037          | 0.044 | 0.056 |
|                                                                            | CPNT    | 0.032          | 0.043 | 0.056 |

**Table S7.** The type I error for detecting the effect of the node on the survival phenotype under three scenarios where the effecting node is randomly selected (n=20000), with DPR as the gene expression prediction model in TWAS. Simulations were conducted with four different between-node correlation patterns (the recombination of quadratic and sine, sine, quadratic, and linear) and three different censoring rates (0.1, 0.3, and 0.5).

| <b>Scenario 1 :Only node changes</b>                                       |         |                |       |       |
|----------------------------------------------------------------------------|---------|----------------|-------|-------|
| Correlation patterns                                                       | Methods | Censoring rate |       |       |
|                                                                            |         | 0.1            | 0.3   | 0.5   |
| $x_k = 0.5x_l$                                                             | CoNet   | 0.056          | 0.056 | 0.053 |
|                                                                            | CPNT    | 0.055          | 0.052 | 0.053 |
| $x_k = 0.1x_l^2$                                                           | CoNet   | 0.070          | 0.064 | 0.051 |
|                                                                            | CPNT    | 0.064          | 0.068 | 0.050 |
| $x_k = \sin x_l$                                                           | CoNet   | 0.070          | 0.060 | 0.047 |
|                                                                            | CPNT    | 0.063          | 0.068 | 0.052 |
| $x_k = \sin^2 x_l$                                                         | CoNet   | 0.047          | 0.061 | 0.048 |
|                                                                            | CPNT    | 0.049          | 0.068 | 0.050 |
| <b>Scenario 2 : Both node and edge change with node hanging on edge</b>    |         |                |       |       |
| Correlation patterns                                                       | Methods | Censoring rate |       |       |
|                                                                            |         | 0.1            | 0.3   | 0.5   |
| $x_k = 0.5x_l$                                                             | CoNet   | 0.053          | 0.052 | 0.058 |
|                                                                            | CPNT    | 0.054          | 0.053 | 0.064 |
| $x_k = 0.1x_l^2$                                                           | CoNet   | 0.049          | 0.051 | 0.051 |
|                                                                            | CPNT    | 0.055          | 0.051 | 0.049 |
| $x_k = \sin x_l$                                                           | CoNet   | 0.048          | 0.049 | 0.053 |
|                                                                            | CPNT    | 0.051          | 0.048 | 0.049 |
| $x_k = \sin^2 x_l$                                                         | CoNet   | 0.048          | 0.049 | 0.052 |
|                                                                            | CPNT    | 0.051          | 0.050 | 0.049 |
| <b>Scenario 3: Both node and edge change with node not hanging on edge</b> |         |                |       |       |
| Correlation patterns                                                       | Methods | Censoring rate |       |       |
|                                                                            |         | 0.1            | 0.3   | 0.5   |
| $x_k = 0.5x_l$                                                             | CoNet   | 0.042          | 0.050 | 0.046 |
|                                                                            | CPNT    | 0.044          | 0.050 | 0.046 |
| $x_k = 0.1x_l^2$                                                           | CoNet   | 0.060          | 0.051 | 0.042 |
|                                                                            | CPNT    | 0.060          | 0.053 | 0.042 |
| $x_k = \sin x_l$                                                           | CoNet   | 0.050          | 0.055 | 0.061 |
|                                                                            | CPNT    | 0.052          | 0.053 | 0.060 |
| $x_k = \sin^2 x_l$                                                         | CoNet   | 0.051          | 0.055 | 0.061 |
|                                                                            | CPNT    | 0.051          | 0.058 | 0.061 |

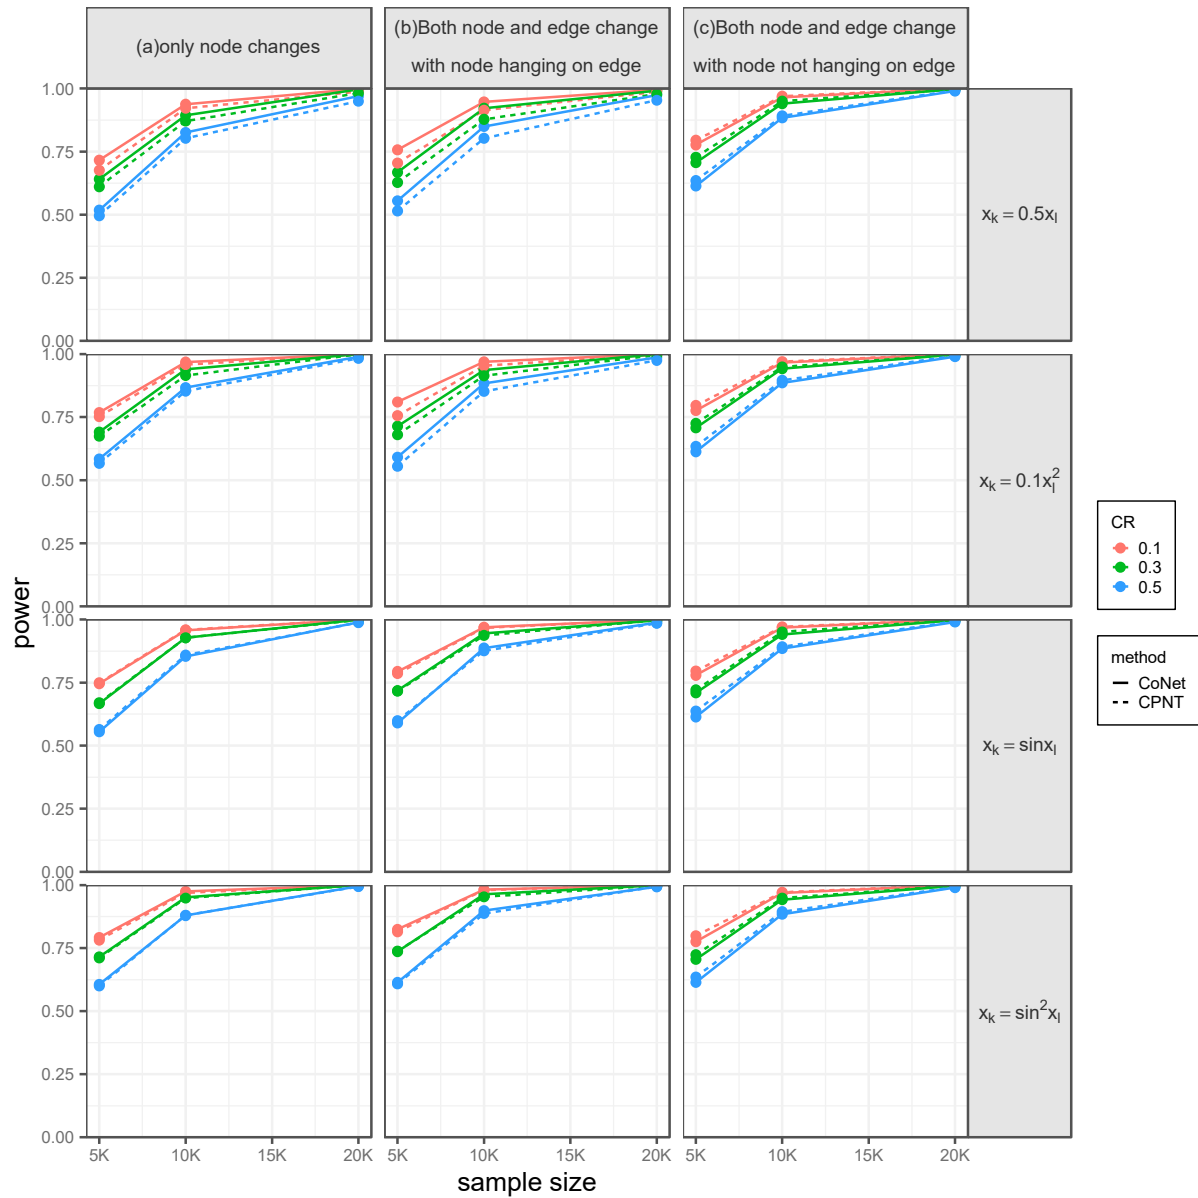

**Figure S1.** The power for detecting the effect of the node on the survival phenotype under the setting that the effecting node is randomly selected, with DPR as the gene expression prediction model in TWAS. Simulations were conducted with four different between-node correlation patterns (the recombination of quadratic and sine, sine, quadratic, and linear) and three different censoring rates (0.1, 0.3, and 0.5): (a) Only a node has an effect; (b) Both node and edge have effects, with the effecting node hanging on the edge; (c) Both node and edge have effects, with the effecting node not hanging on the edge.



**Table S8.** The type I error for detecting the effect of the edge on the survival phenotype under three scenarios where the effecting edge is randomly selected (n=5000), with DPR as the gene expression prediction model in TWAS. Simulations were conducted with four different between-node correlation patterns (the recombination of quadratic and sine, sine, quadratic, and linear) and three different censoring rates (0.1, 0.3, and 0.5).

| <b>Scenario 1 :Only edge changes</b>                                       |         |                |       |       |
|----------------------------------------------------------------------------|---------|----------------|-------|-------|
| Correlation patterns                                                       | Methods | Censoring rate |       |       |
|                                                                            |         | 0.1            | 0.3   | 0.5   |
| $x_k = 0.5x_l$                                                             | CoNet   | 0.041          | 0.043 | 0.053 |
|                                                                            | CPNT    | 0.048          | 0.045 | 0.050 |
| $x_k = 0.1x_l^2$                                                           | CoNet   | 0.033          | 0.056 | 0.051 |
|                                                                            | CPNT    | 0.054          | 0.049 | 0.049 |
| $x_k = \sin x_l$                                                           | CoNet   | 0.041          | 0.049 | 0.054 |
|                                                                            | CPNT    | 0.052          | 0.050 | 0.045 |
| $x_k = \sin^2 x_l$                                                         | CoNet   | 0.039          | 0.051 | 0.048 |
|                                                                            | CPNT    | 0.047          | 0.043 | 0.045 |
| <b>Scenario 2 : Both node and edge change with node hanging on edge</b>    |         |                |       |       |
| Correlation patterns                                                       | Methods | Censoring rate |       |       |
|                                                                            |         | 0.1            | 0.3   | 0.5   |
| $x_k = 0.5x_l$                                                             | CoNet   | 0.042          | 0.048 | 0.050 |
|                                                                            | CPNT    | 0.035          | 0.041 | 0.058 |
| $x_k = 0.1x_l^2$                                                           | CoNet   | 0.045          | 0.052 | 0.063 |
|                                                                            | CPNT    | 0.047          | 0.050 | 0.043 |
| $x_k = \sin x_l$                                                           | CoNet   | 0.040          | 0.053 | 0.059 |
|                                                                            | CPNT    | 0.046          | 0.048 | 0.046 |
| $x_k = \sin^2 x_l$                                                         | CoNet   | 0.045          | 0.050 | 0.054 |
|                                                                            | CPNT    | 0.048          | 0.046 | 0.045 |
| <b>Scenario 3: Both node and edge change with node not hanging on edge</b> |         |                |       |       |
| Correlation patterns                                                       | Methods | Censoring rate |       |       |
|                                                                            |         | 0.1            | 0.3   | 0.5   |
| $x_k = 0.5x_l$                                                             | CoNet   | 0.046          | 0.048 | 0.059 |
|                                                                            | CPNT    | 0.047          | 0.056 | 0.058 |
| $x_k = 0.1x_l^2$                                                           | CoNet   | 0.053          | 0.051 | 0.053 |
|                                                                            | CPNT    | 0.045          | 0.046 | 0.043 |
| $x_k = \sin x_l$                                                           | CoNet   | 0.040          | 0.047 | 0.049 |
|                                                                            | CPNT    | 0.043          | 0.048 | 0.047 |
| $x_k = \sin^2 x_l$                                                         | CoNet   | 0.042          | 0.052 | 0.049 |
|                                                                            | CPNT    | 0.042          | 0.044 | 0.044 |

**Table S9.** The type I error for detecting the effect of the edge on the survival phenotype under three scenarios where the effecting edge is randomly selected (n=10000), with DPR as the gene expression prediction model in TWAS. Simulations were conducted with four different between-node correlation patterns (the recombination of quadratic and sine, sine, quadratic, and linear) and three different censoring rates (0.1, 0.3, and 0.5).

| <b>Scenario 1 :Only edge changes</b>                                       |         |                |       |       |
|----------------------------------------------------------------------------|---------|----------------|-------|-------|
| Correlation patterns                                                       | Methods | Censoring rate |       |       |
|                                                                            |         | 0.1            | 0.3   | 0.5   |
| $x_k = 0.5x_l$                                                             | CoNet   | 0.047          | 0.058 | 0.068 |
|                                                                            | CPNT    | 0.036          | 0.043 | 0.043 |
| $x_k = 0.1x_l^2$                                                           | CoNet   | 0.050          | 0.047 | 0.051 |
|                                                                            | CPNT    | 0.049          | 0.042 | 0.052 |
| $x_k = \sin x_l$                                                           | CoNet   | 0.035          | 0.046 | 0.058 |
|                                                                            | CPNT    | 0.044          | 0.045 | 0.052 |
| $x_k = \sin^2 x_l$                                                         | CoNet   | 0.028          | 0.045 | 0.047 |
|                                                                            | CPNT    | 0.049          | 0.044 | 0.054 |
| <b>Scenario 2 : Both node and edge change with node hanging on edge</b>    |         |                |       |       |
| Correlation patterns                                                       | Methods | Censoring rate |       |       |
|                                                                            |         | 0.1            | 0.3   | 0.5   |
| $x_k = 0.5x_l$                                                             | CoNet   | 0.051          | 0.061 | 0.065 |
|                                                                            | CPNT    | 0.050          | 0.054 | 0.037 |
| $x_k = 0.1x_l^2$                                                           | CoNet   | 0.058          | 0.051 | 0.053 |
|                                                                            | CPNT    | 0.042          | 0.045 | 0.049 |
| $x_k = \sin x_l$                                                           | CoNet   | 0.047          | 0.050 | 0.049 |
|                                                                            | CPNT    | 0.036          | 0.047 | 0.048 |
| $x_k = \sin^2 x_l$                                                         | CoNet   | 0.051          | 0.052 | 0.048 |
|                                                                            | CPNT    | 0.038          | 0.045 | 0.050 |
| <b>Scenario 3: Both node and edge change with node not hanging on edge</b> |         |                |       |       |
| Correlation patterns                                                       | Methods | Censoring rate |       |       |
|                                                                            |         | 0.1            | 0.3   | 0.5   |
| $x_k = 0.5x_l$                                                             | CoNet   | 0.033          | 0.033 | 0.033 |
|                                                                            | CPNT    | 0.046          | 0.050 | 0.051 |
| $x_k = 0.1x_l^2$                                                           | CoNet   | 0.047          | 0.057 | 0.055 |
|                                                                            | CPNT    | 0.045          | 0.046 | 0.046 |
| $x_k = \sin x_l$                                                           | CoNet   | 0.045          | 0.051 | 0.057 |
|                                                                            | CPNT    | 0.052          | 0.060 | 0.060 |
| $x_k = \sin^2 x_l$                                                         | CoNet   | 0.039          | 0.049 | 0.056 |
|                                                                            | CPNT    | 0.054          | 0.066 | 0.056 |

**Table S10.** The type I error for detecting the effect of the edge on the survival phenotype under three scenarios where the effecting edge is randomly selected (n=20000), with DPR as the gene expression prediction model in TWAS. Simulations were conducted with four different between-node correlation patterns (the recombination of quadratic and sine, sine, quadratic, and linear) and three different censoring rates (0.1, 0.3, and 0.5).

| <b>Scenario 1 :Only edge changes</b>                                       |         |                |       |       |
|----------------------------------------------------------------------------|---------|----------------|-------|-------|
| Correlation patterns                                                       | Methods | Censoring rate |       |       |
|                                                                            |         | 0.1            | 0.3   | 0.5   |
| $x_k = 0.5x_l$                                                             | CoNet   | 0.035          | 0.042 | 0.040 |
|                                                                            | CPNT    | 0.029          | 0.035 | 0.038 |
| $x_k = 0.1x_l^2$                                                           | CoNet   | 0.052          | 0.044 | 0.047 |
|                                                                            | CPNT    | 0.041          | 0.041 | 0.044 |
| $x_k = \sin x_l$                                                           | CoNet   | 0.052          | 0.049 | 0.056 |
|                                                                            | CPNT    | 0.041          | 0.040 | 0.044 |
| $x_k = \sin^2 x_l$                                                         | CoNet   | 0.049          | 0.052 | 0.050 |
|                                                                            | CPNT    | 0.039          | 0.043 | 0.043 |
| <b>Scenario 2 : Both node and edge change with node hanging on edge</b>    |         |                |       |       |
| Correlation patterns                                                       | Methods | Censoring rate |       |       |
|                                                                            |         | 0.1            | 0.3   | 0.5   |
| $x_k = 0.5x_l$                                                             | CoNet   | 0.044          | 0.042 | 0.046 |
|                                                                            | CPNT    | 0.049          | 0.053 | 0.058 |
| $x_k = 0.1x_l^2$                                                           | CoNet   | 0.062          | 0.063 | 0.054 |
|                                                                            | CPNT    | 0.066          | 0.057 | 0.048 |
| $x_k = \sin x_l$                                                           | CoNet   | 0.058          | 0.060 | 0.054 |
|                                                                            | CPNT    | 0.047          | 0.051 | 0.044 |
| $x_k = \sin^2 x_l$                                                         | CoNet   | 0.055          | 0.050 | 0.054 |
|                                                                            | CPNT    | 0.050          | 0.056 | 0.047 |
| <b>Scenario 3: Both node and edge change with node not hanging on edge</b> |         |                |       |       |
| Correlation patterns                                                       | Methods | Censoring rate |       |       |
|                                                                            |         | 0.1            | 0.3   | 0.5   |
| $x_k = 0.5x_l$                                                             | CoNet   | 0.046          | 0.048 | 0.059 |
|                                                                            | CPNT    | 0.047          | 0.056 | 0.058 |
| $x_k = 0.1x_l^2$                                                           | CoNet   | 0.040          | 0.043 | 0.047 |
|                                                                            | CPNT    | 0.039          | 0.055 | 0.056 |
| $x_k = \sin x_l$                                                           | CoNet   | 0.045          | 0.050 | 0.058 |
|                                                                            | CPNT    | 0.057          | 0.055 | 0.051 |
| $x_k = \sin^2 x_l$                                                         | CoNet   | 0.046          | 0.061 | 0.055 |
|                                                                            | CPNT    | 0.048          | 0.048 | 0.047 |

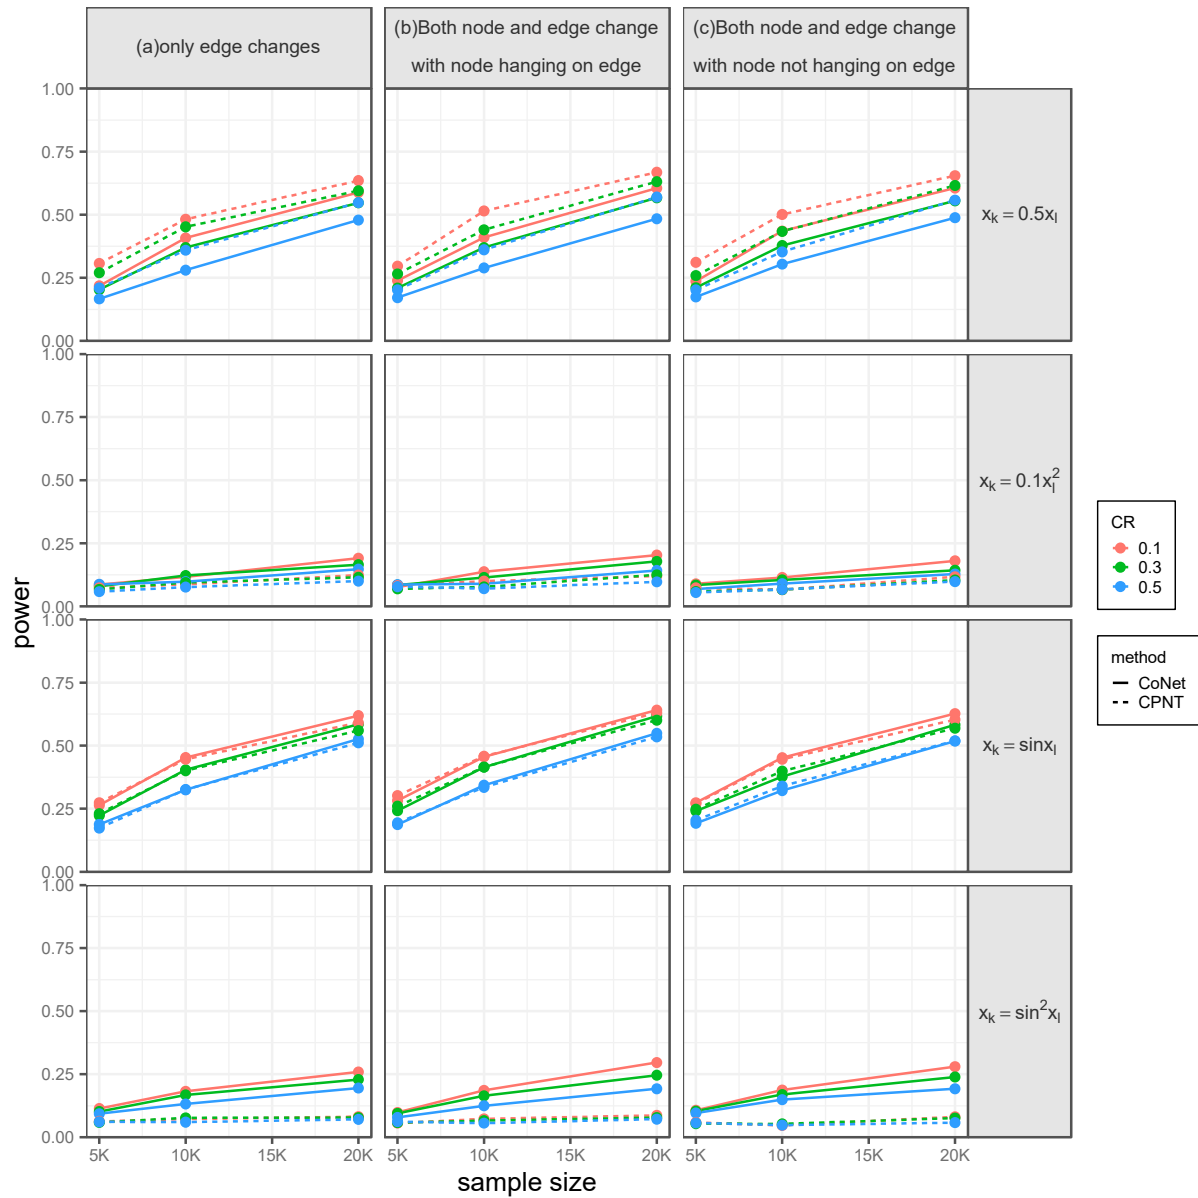

**Figure S2.** The power for detecting the effect of the edge on the survival phenotype under the setting that the effecting edge is randomly selected, with DPR as the gene expression prediction model in TWAS. Simulations were conducted with four different between-node correlation patterns (the recombination of quadratic and sine, sine, quadratic, and linear) and three different censoring rates (0.1, 0.3, and 0.5): (a) Only a node has an effect; (b) Both node and edge have effects, with the effecting node hanging on the edge; (c) Both node and edge have effects, with the effecting node not hanging on the edge.

**Table S11.** The type I error for detecting the effect of the node on the survival phenotype under three scenarios where the effecting node is pre-specified(n=5000), with BSLMM as the gene expression prediction model in TWAS. Simulations were conducted with four different between-node correlation patterns (the recombination of quadratic and sine, sine, quadratic, and linear) and three different censoring rates (0.1, 0.3, and 0.5).

| <b>Scenario 1 :Only node changes</b>                                       |         |                |       |       |
|----------------------------------------------------------------------------|---------|----------------|-------|-------|
| Correlation patterns                                                       | Methods | Censoring rate |       |       |
|                                                                            |         | 0.1            | 0.3   | 0.5   |
| $x_k = 0.5x_l$                                                             | CoNet   | 0.052          | 0.047 | 0.05  |
|                                                                            | CPNT    | 0.051          | 0.052 | 0.048 |
| $x_k = 0.1x_l^2$                                                           | CoNet   | 0.051          | 0.052 | 0.061 |
|                                                                            | CPNT    | 0.050          | 0.053 | 0.063 |
| $x_k = \sin x_l$                                                           | CoNet   | 0.051          | 0.052 | 0.059 |
|                                                                            | CPNT    | 0.048          | 0.052 | 0.062 |
| $x_k = \sin^2 x_l$                                                         | CoNet   | 0.050          | 0.052 | 0.061 |
|                                                                            | CPNT    | 0.049          | 0.053 | 0.064 |
| <b>Scenario 2 : Both node and edge change with node hanging on edge</b>    |         |                |       |       |
| Correlation patterns                                                       | Methods | Censoring rate |       |       |
|                                                                            |         | 0.1            | 0.3   | 0.5   |
| $x_k = 0.5x_l$                                                             | CoNet   | 0.050          | 0.046 | 0.047 |
|                                                                            | CPNT    | 0.052          | 0.050 | 0.043 |
| $x_k = 0.1x_l^2$                                                           | CoNet   | 0.052          | 0.054 | 0.051 |
|                                                                            | CPNT    | 0.052          | 0.054 | 0.048 |
| $x_k = \sin x_l$                                                           | CoNet   | 0.054          | 0.059 | 0.055 |
|                                                                            | CPNT    | 0.057          | 0.053 | 0.053 |
| $x_k = \sin^2 x_l$                                                         | CoNet   | 0.052          | 0.048 | 0.047 |
|                                                                            | CPNT    | 0.051          | 0.050 | 0.050 |
| <b>Scenario 3: Both node and edge change with node not hanging on edge</b> |         |                |       |       |
| Correlation patterns                                                       | Methods | Censoring rate |       |       |
|                                                                            |         | 0.1            | 0.3   | 0.5   |
| $x_k = 0.5x_l$                                                             | CoNet   | 0.052          | 0.060 | 0.053 |
|                                                                            | CPNT    | 0.055          | 0.058 | 0.054 |
| $x_k = 0.1x_l^2$                                                           | CoNet   | 0.056          | 0.068 | 0.064 |
|                                                                            | CPNT    | 0.056          | 0.064 | 0.061 |
| $x_k = \sin x_l$                                                           | CoNet   | 0.057          | 0.067 | 0.067 |
|                                                                            | CPNT    | 0.056          | 0.065 | 0.058 |
| $x_k = \sin^2 x_l$                                                         | CoNet   | 0.060          | 0.065 | 0.065 |
|                                                                            | CPNT    | 0.054          | 0.065 | 0.058 |

**Table S12.** The type I error for detecting the effect of the node on the survival phenotype under three scenarios where the effecting node is pre-specified(n=10000), with BSLMM as the gene expression prediction model in TWAS. Simulations were conducted with four different between-node correlation patterns (the recombination of quadratic and sine, sine, quadratic, and linear) and three different censoring rates (0.1, 0.3, and 0.5).

| Scenario 1 :Only node changes                                       |         |                |       |       |
|---------------------------------------------------------------------|---------|----------------|-------|-------|
| Correlation patterns                                                | Methods | Censoring rate |       |       |
|                                                                     |         | 0.1            | 0.3   | 0.5   |
| $x_k = 0.5x_l$                                                      | CoNet   | 0.044          | 0.045 | 0.046 |
|                                                                     | CPNT    | 0.046          | 0.043 | 0.046 |
| $x_k = 0.1x_l^2$                                                    | CoNet   | 0.046          | 0.047 | 0.051 |
|                                                                     | CPNT    | 0.046          | 0.044 | 0.050 |
| $x_k = \sin x_l$                                                    | CoNet   | 0.048          | 0.047 | 0.049 |
|                                                                     | CPNT    | 0.045          | 0.044 | 0.049 |
| $x_k = \sin^2 x_l$                                                  | CoNet   | 0.046          | 0.049 | 0.050 |
|                                                                     | CPNT    | 0.045          | 0.045 | 0.051 |
| Scenario 2 : Both node and edge change with node hanging on edge    |         |                |       |       |
| Correlation patterns                                                | Methods | Censoring rate |       |       |
|                                                                     |         | 0.1            | 0.3   | 0.5   |
| $x_k = 0.5x_l$                                                      | CoNet   | 0.032          | 0.031 | 0.041 |
|                                                                     | CPNT    | 0.036          | 0.036 | 0.041 |
| $x_k = 0.1x_l^2$                                                    | CoNet   | 0.051          | 0.048 | 0.047 |
|                                                                     | CPNT    | 0.049          | 0.050 | 0.048 |
| $x_k = \sin x_l$                                                    | CoNet   | 0.046          | 0.043 | 0.034 |
|                                                                     | CPNT    | 0.042          | 0.041 | 0.034 |
| $x_k = \sin^2 x_l$                                                  | CoNet   | 0.051          | 0.040 | 0.046 |
|                                                                     | CPNT    | 0.049          | 0.046 | 0.048 |
| Scenario 3: Both node and edge change with node not hanging on edge |         |                |       |       |
| Correlation patterns                                                | Methods | Censoring rate |       |       |
|                                                                     |         | 0.1            | 0.3   | 0.5   |
| $x_k = 0.5x_l$                                                      | CoNet   | 0.048          | 0.050 | 0.042 |
|                                                                     | CPNT    | 0.040          | 0.044 | 0.045 |
| $x_k = 0.1x_l^2$                                                    | CoNet   | 0.050          | 0.060 | 0.055 |
|                                                                     | CPNT    | 0.056          | 0.064 | 0.055 |
| $x_k = \sin x_l$                                                    | CoNet   | 0.049          | 0.060 | 0.053 |
|                                                                     | CPNT    | 0.056          | 0.063 | 0.054 |
| $x_k = \sin^2 x_l$                                                  | CoNet   | 0.047          | 0.060 | 0.055 |
|                                                                     | CPNT    | 0.055          | 0.062 | 0.054 |

**Table S13.** The type I error for detecting the effect of the node on the survival phenotype under three scenarios where the effecting node is pre-specified(n=20000), with BSLMM as the gene expression prediction model in TWAS. Simulations were conducted with four different between-node correlation patterns (the recombination of quadratic and sine, sine, quadratic, and linear) and three different censoring rates (0.1, 0.3, and 0.5).

| <b>Scenario 1 :Only node changes</b>                                       |         |                |       |       |
|----------------------------------------------------------------------------|---------|----------------|-------|-------|
| Correlation patterns                                                       | Methods | Censoring rate |       |       |
|                                                                            |         | 0.1            | 0.3   | 0.5   |
| $x_k = 0.5x_l$                                                             | CoNet   | 0.062          | 0.055 | 0.05  |
|                                                                            | CPNT    | 0.059          | 0.052 | 0.052 |
| $x_k = 0.1x_l^2$                                                           | CoNet   | 0.044          | 0.056 | 0.039 |
|                                                                            | CPNT    | 0.045          | 0.056 | 0.037 |
| $x_k = \sin x_l$                                                           | CoNet   | 0.044          | 0.056 | 0.04  |
|                                                                            | CPNT    | 0.044          | 0.056 | 0.039 |
| $x_k = \sin^2 x_l$                                                         | CoNet   | 0.043          | 0.057 | 0.040 |
|                                                                            | CPNT    | 0.043          | 0.056 | 0.038 |
| <b>Scenario 2 : Both node and edge change with node hanging on edge</b>    |         |                |       |       |
| Correlation patterns                                                       | Methods | Censoring rate |       |       |
|                                                                            |         | 0.1            | 0.3   | 0.5   |
| $x_k = 0.5x_l$                                                             | CoNet   | 0.047          | 0.053 | 0.052 |
|                                                                            | CPNT    | 0.046          | 0.052 | 0.049 |
| $x_k = 0.1x_l^2$                                                           | CoNet   | 0.051          | 0.041 | 0.045 |
|                                                                            | CPNT    | 0.045          | 0.048 | 0.045 |
| $x_k = \sin x_l$                                                           | CoNet   | 0.053          | 0.040 | 0.048 |
|                                                                            | CPNT    | 0.053          | 0.037 | 0.047 |
| $x_k = \sin^2 x_l$                                                         | CoNet   | 0.056          | 0.043 | 0.042 |
|                                                                            | CPNT    | 0.048          | 0.052 | 0.044 |
| <b>Scenario 3: Both node and edge change with node not hanging on edge</b> |         |                |       |       |
| Correlation patterns                                                       | Methods | Censoring rate |       |       |
|                                                                            |         | 0.1            | 0.3   | 0.5   |
| $x_k = 0.5x_l$                                                             | CoNet   | 0.058          | 0.071 | 0.055 |
|                                                                            | CPNT    | 0.060          | 0.073 | 0.055 |
| $x_k = 0.1x_l^2$                                                           | CoNet   | 0.051          | 0.053 | 0.052 |
|                                                                            | CPNT    | 0.053          | 0.058 | 0.054 |
| $x_k = \sin x_l$                                                           | CoNet   | 0.053          | 0.055 | 0.054 |
|                                                                            | CPNT    | 0.053          | 0.058 | 0.056 |
| $x_k = \sin^2 x_l$                                                         | CoNet   | 0.050          | 0.053 | 0.053 |
|                                                                            | CPNT    | 0.053          | 0.058 | 0.055 |

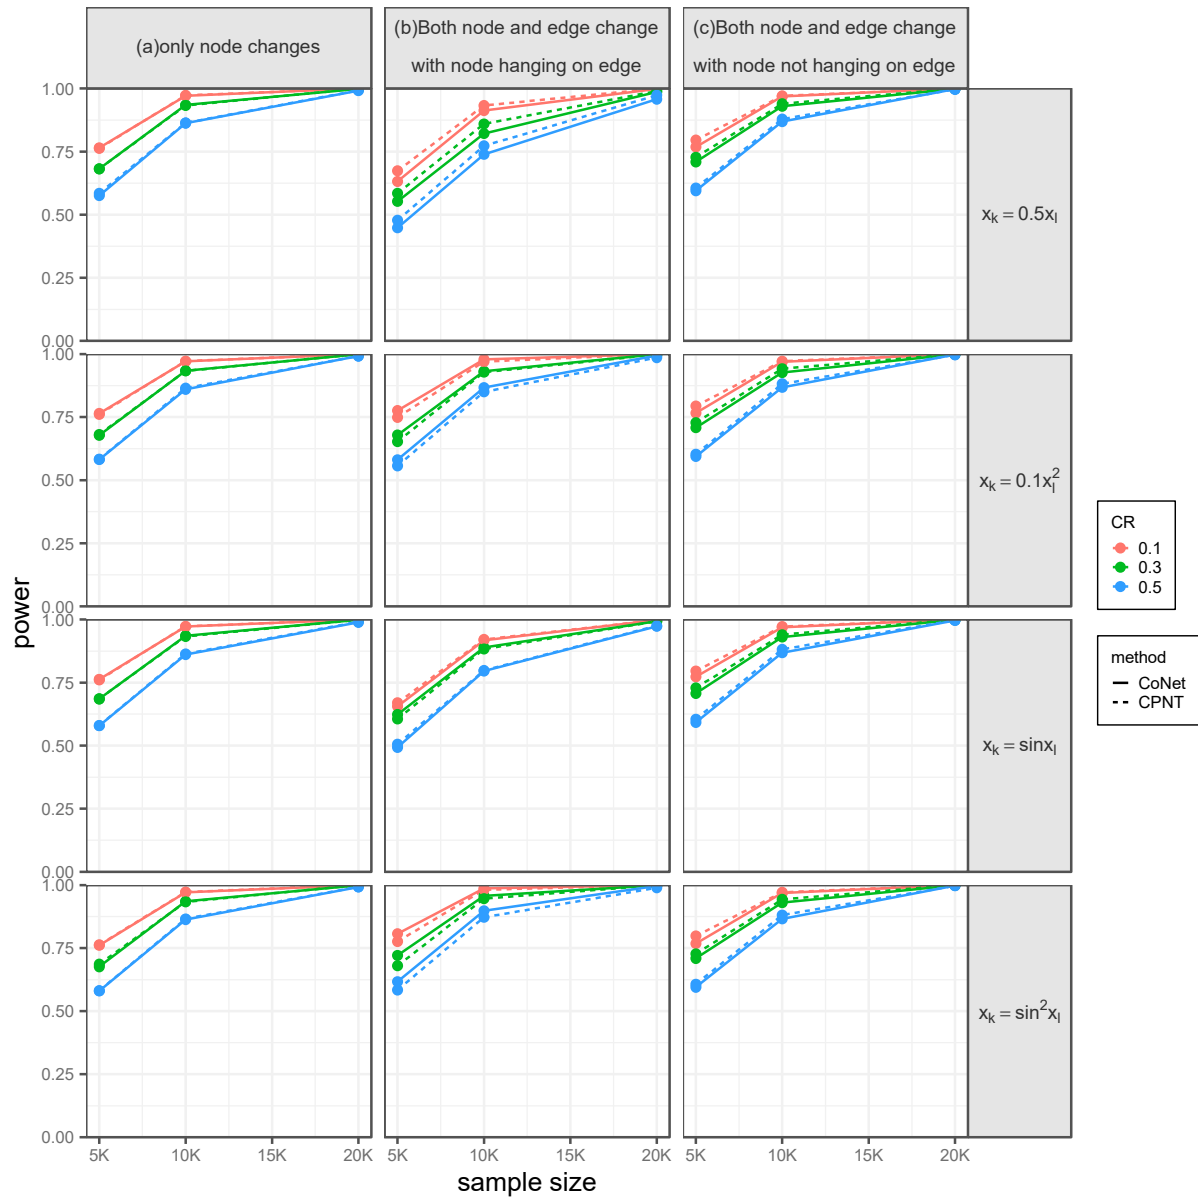

**Figure S3.** The power for detecting the effect of the node on the survival phenotype under the setting that the effecting node is pre-specified, with BSLMM as the gene expression prediction model in TWAS. Simulations were conducted with four different between-node correlation patterns (the recombination of quadratic and sine, sine, quadratic, and linear) and three different censoring rates (0.1, 0.3, and 0.5): (a) Only a node has an effect; (b) Both node and edge have effects, with the effecting node hanging on the edge; (c) Both node and edge have effects, with the effecting node not hanging on the edge.



**Table S14.** The type I error for detecting the effect of the edge on the survival phenotype under three scenarios where the effecting edge is pre-specified(n=5000), with BSLMM as the gene expression prediction model in TWAS. Simulations were conducted with four different between-node correlation patterns (the recombination of quadratic and sine, sine, quadratic, and linear) and three different censoring rates (0.1, 0.3, and 0.5).

| Scenario 1 :Only edge changes                                       |         |                |       |       |
|---------------------------------------------------------------------|---------|----------------|-------|-------|
| Correlation patterns                                                | Methods | Censoring rate |       |       |
|                                                                     |         | 0.1            | 0.3   | 0.5   |
| $x_k = 0.5x_l$                                                      | CoNet   | 0.046          | 0.061 | 0.057 |
|                                                                     | CPNT    | 0.058          | 0.058 | 0.053 |
| $x_k = 0.1x_l^2$                                                    | CoNet   | 0.044          | 0.051 | 0.053 |
|                                                                     | CPNT    | 0.044          | 0.043 | 0.044 |
| $x_k = \sin x_l$                                                    | CoNet   | 0.039          | 0.044 | 0.043 |
|                                                                     | CPNT    | 0.044          | 0.045 | 0.042 |
| $x_k = \sin^2 x_l$                                                  | CoNet   | 0.051          | 0.050 | 0.052 |
|                                                                     | CPNT    | 0.043          | 0.047 | 0.046 |
| Scenario 2 : Both node and edge change with node hanging on edge    |         |                |       |       |
| Correlation patterns                                                | Methods | Censoring rate |       |       |
|                                                                     |         | 0.1            | 0.3   | 0.5   |
| $x_k = 0.5x_l$                                                      | CoNet   | 0.042          | 0.053 | 0.056 |
|                                                                     | CPNT    | 0.043          | 0.051 | 0.059 |
| $x_k = 0.1x_l^2$                                                    | CoNet   | 0.056          | 0.049 | 0.048 |
|                                                                     | CPNT    | 0.045          | 0.046 | 0.054 |
| $x_k = \sin x_l$                                                    | CoNet   | 0.036          | 0.054 | 0.060 |
|                                                                     | CPNT    | 0.044          | 0.061 | 0.053 |
| $x_k = \sin^2 x_l$                                                  | CoNet   | 0.054          | 0.047 | 0.051 |
|                                                                     | CPNT    | 0.048          | 0.061 | 0.049 |
| Scenario 3: Both node and edge change with node not hanging on edge |         |                |       |       |
| Correlation patterns                                                | Methods | Censoring rate |       |       |
|                                                                     |         | 0.1            | 0.3   | 0.5   |
| $x_k = 0.5x_l$                                                      | CoNet   | 0.053          | 0.049 | 0.045 |
|                                                                     | CPNT    | 0.040          | 0.039 | 0.050 |
| $x_k = 0.1x_l^2$                                                    | CoNet   | 0.056          | 0.052 | 0.048 |
|                                                                     | CPNT    | 0.047          | 0.056 | 0.054 |
| $x_k = \sin x_l$                                                    | CoNet   | 0.059          | 0.059 | 0.060 |
|                                                                     | CPNT    | 0.054          | 0.062 | 0.057 |
| $x_k = \sin^2 x_l$                                                  | CoNet   | 0.048          | 0.052 | 0.055 |
|                                                                     | CPNT    | 0.047          | 0.044 | 0.056 |

**Table S15.** The type I error for detecting the effect of the edge on the survival phenotype under three scenarios where the effecting edge is pre-specified(n=10000), with BSLMM as the gene expression prediction model in TWAS. Simulations were conducted with four different between-node correlation patterns (the recombination of quadratic and sine, sine, quadratic, and linear) and three different censoring rates (0.1, 0.3, and 0.5).

| Scenario 1 :Only edge changes                                       |         |                |       |       |
|---------------------------------------------------------------------|---------|----------------|-------|-------|
| Correlation patterns                                                | Methods | Censoring rate |       |       |
|                                                                     |         | 0.1            | 0.3   | 0.5   |
| $x_k = 0.5x_l$                                                      | CoNet   | 0.049          | 0.048 | 0.058 |
|                                                                     | CPNT    | 0.052          | 0.053 | 0.056 |
| $x_k = 0.1x_l^2$                                                    | CoNet   | 0.056          | 0.057 | 0.050 |
|                                                                     | CPNT    | 0.053          | 0.049 | 0.044 |
| $x_k = \sin x_l$                                                    | CoNet   | 0.048          | 0.051 | 0.044 |
|                                                                     | CPNT    | 0.042          | 0.056 | 0.041 |
| $x_k = \sin^2 x_l$                                                  | CoNet   | 0.045          | 0.043 | 0.051 |
|                                                                     | CPNT    | 0.050          | 0.042 | 0.043 |
| Scenario 2 : Both node and edge change with node hanging on edge    |         |                |       |       |
| Correlation patterns                                                | Methods | Censoring rate |       |       |
|                                                                     |         | 0.1            | 0.3   | 0.5   |
| $x_k = 0.5x_l$                                                      | CoNet   | 0.046          | 0.055 | 0.047 |
|                                                                     | CPNT    | 0.057          | 0.063 | 0.055 |
| $x_k = 0.1x_l^2$                                                    | CoNet   | 0.058          | 0.041 | 0.060 |
|                                                                     | CPNT    | 0.055          | 0.036 | 0.054 |
| $x_k = \sin x_l$                                                    | CoNet   | 0.056          | 0.042 | 0.058 |
|                                                                     | CPNT    | 0.051          | 0.044 | 0.066 |
| $x_k = \sin^2 x_l$                                                  | CoNet   | 0.050          | 0.047 | 0.046 |
|                                                                     | CPNT    | 0.053          | 0.058 | 0.051 |
| Scenario 3: Both node and edge change with node not hanging on edge |         |                |       |       |
| Correlation patterns                                                | Methods | Censoring rate |       |       |
|                                                                     |         | 0.1            | 0.3   | 0.5   |
| $x_k = 0.5x_l$                                                      | CoNet   | 0.061          | 0.060 | 0.061 |
|                                                                     | CPNT    | 0.056          | 0.054 | 0.051 |
| $x_k = 0.1x_l^2$                                                    | CoNet   | 0.056          | 0.053 | 0.044 |
|                                                                     | CPNT    | 0.048          | 0.040 | 0.048 |
| $x_k = \sin x_l$                                                    | CoNet   | 0.047          | 0.056 | 0.052 |
|                                                                     | CPNT    | 0.047          | 0.040 | 0.055 |
| $x_k = \sin^2 x_l$                                                  | CoNet   | 0.058          | 0.059 | 0.049 |
|                                                                     | CPNT    | 0.036          | 0.040 | 0.042 |

**Table S16.** The type I error for detecting the effect of the edge on the survival phenotype under three scenarios where the effecting edge is pre-specified(n=20000), with BSLMM as the gene expression prediction model in TWAS. Simulations were conducted with four different between-node correlation patterns (the recombination of quadratic and sine, sine, quadratic, and linear) and three different censoring rates (0.1, 0.3, and 0.5).

| Scenario 1 :Only edge changes                                       |         |                |       |       |
|---------------------------------------------------------------------|---------|----------------|-------|-------|
| Correlation patterns                                                | Methods | Censoring rate |       |       |
|                                                                     |         | 0.1            | 0.3   | 0.5   |
| $x_k = 0.5x_l$                                                      | CoNet   | 0.049          | 0.040 | 0.054 |
|                                                                     | CPNT    | 0.049          | 0.052 | 0.064 |
| $x_k = 0.1x_l^2$                                                    | CoNet   | 0.058          | 0.051 | 0.060 |
|                                                                     | CPNT    | 0.057          | 0.047 | 0.050 |
| $x_k = \sin x_l$                                                    | CoNet   | 0.049          | 0.046 | 0.039 |
|                                                                     | CPNT    | 0.047          | 0.047 | 0.045 |
| $x_k = \sin^2 x_l$                                                  | CoNet   | 0.044          | 0.049 | 0.052 |
|                                                                     | CPNT    | 0.044          | 0.046 | 0.044 |
| Scenario 2 : Both node and edge change with node hanging on edge    |         |                |       |       |
| Correlation patterns                                                | Methods | Censoring rate |       |       |
|                                                                     |         | 0.1            | 0.3   | 0.5   |
| $x_k = 0.5x_l$                                                      | CoNet   | 0.060          | 0.044 | 0.052 |
|                                                                     | CPNT    | 0.061          | 0.050 | 0.044 |
| $x_k = 0.1x_l^2$                                                    | CoNet   | 0.048          | 0.066 | 0.058 |
|                                                                     | CPNT    | 0.042          | 0.068 | 0.051 |
| $x_k = \sin x_l$                                                    | CoNet   | 0.045          | 0.045 | 0.041 |
|                                                                     | CPNT    | 0.051          | 0.045 | 0.046 |
| $x_k = \sin^2 x_l$                                                  | CoNet   | 0.059          | 0.057 | 0.038 |
|                                                                     | CPNT    | 0.061          | 0.046 | 0.045 |
| Scenario 3: Both node and edge change with node not hanging on edge |         |                |       |       |
| Correlation patterns                                                | Methods | Censoring rate |       |       |
|                                                                     |         | 0.1            | 0.3   | 0.5   |
| $x_k = 0.5x_l$                                                      | CoNet   | 0.051          | 0.059 | 0.052 |
|                                                                     | CPNT    | 0.044          | 0.042 | 0.048 |
| $x_k = 0.1x_l^2$                                                    | CoNet   | 0.043          | 0.041 | 0.047 |
|                                                                     | CPNT    | 0.053          | 0.051 | 0.061 |
| $x_k = \sin x_l$                                                    | CoNet   | 0.055          | 0.053 | 0.050 |
|                                                                     | CPNT    | 0.050          | 0.058 | 0.051 |
| $x_k = \sin^2 x_l$                                                  | CoNet   | 0.053          | 0.055 | 0.055 |
|                                                                     | CPNT    | 0.062          | 0.057 | 0.053 |

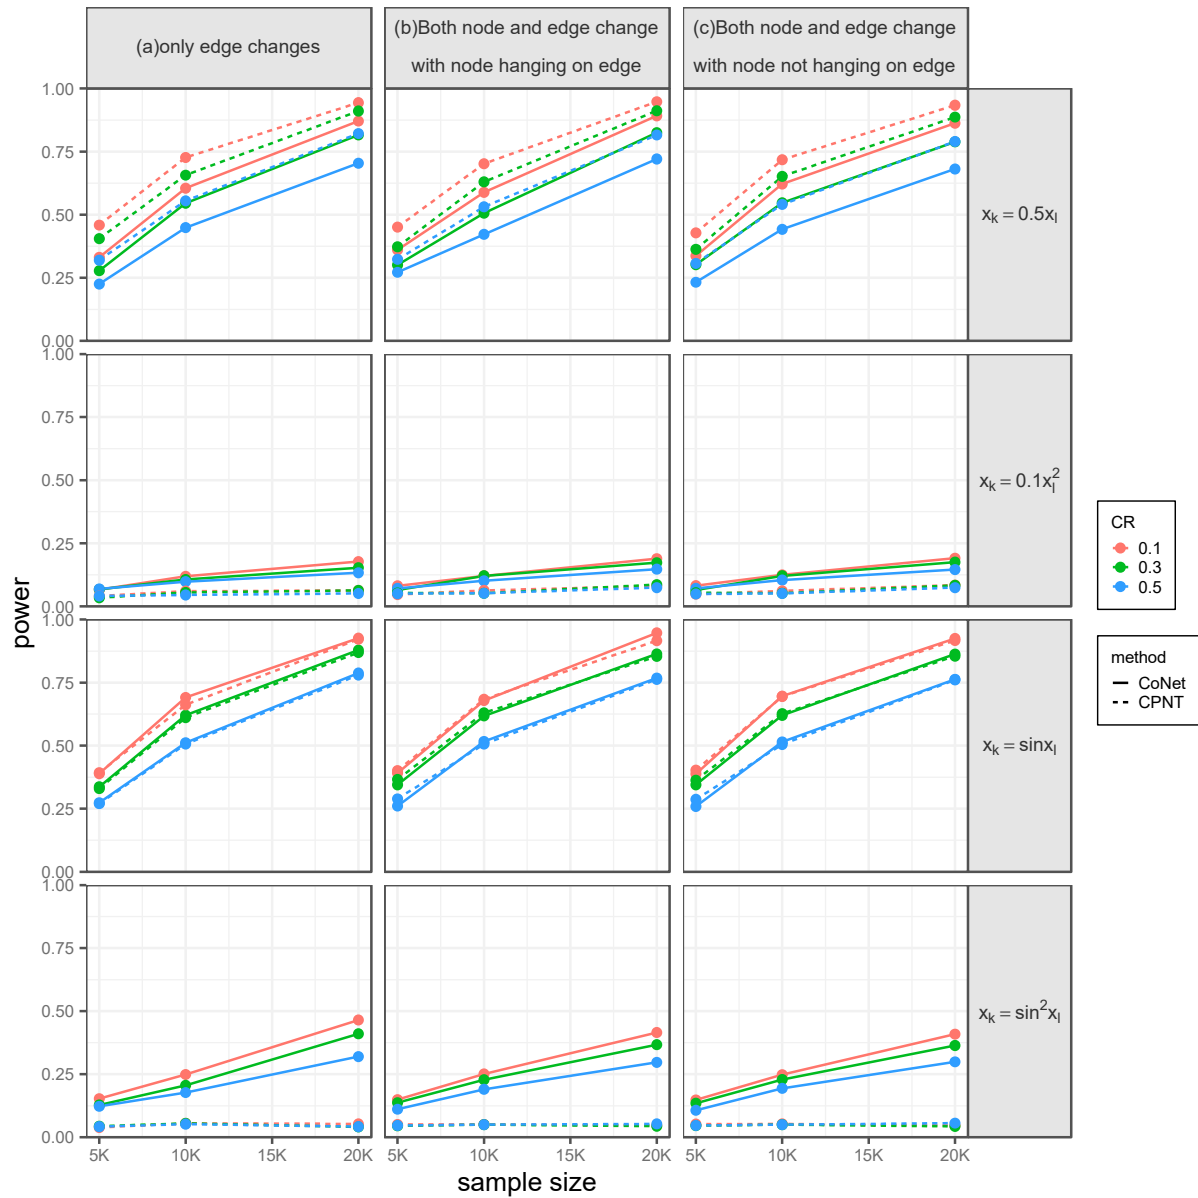

**Figure S4.** The power for detecting the effect of the edge on the survival phenotype under the setting that the effecting edge is pre-specified, with BSLMM as the gene expression prediction model in TWAS. Simulations were conducted with four different between-node correlation patterns (the recombination of quadratic and sine, sine, quadratic, and linear) and three different censoring rates (0.1, 0.3, and 0.5): (a) Only a node has an effect; (b) Both node and edge have effects, with the effecting node hanging on the edge; (c) Both node and edge have effects, with the effecting node not hanging on the edge.

**Table S17.** The type I error for detecting the effect of the node on the survival phenotype under three scenarios where the effecting node is randomly selected (n=5000), with BSLMM as the gene expression prediction model in TWAS. Simulations were conducted with four different between-node correlation patterns (the recombination of quadratic and sine, sine, quadratic, and linear) and three different censoring rates (0.1, 0.3, and 0.5).

| <b>Scenario 1 :Only node changes</b>                                       |         |                |       |       |
|----------------------------------------------------------------------------|---------|----------------|-------|-------|
| Correlation patterns                                                       | Methods | Censoring rate |       |       |
|                                                                            |         | 0.1            | 0.3   | 0.5   |
| $x_k = 0.5x_l$                                                             | CoNet   | 0.048          | 0.044 | 0.046 |
|                                                                            | CPNT    | 0.047          | 0.039 | 0.041 |
| $x_k = 0.1x_l^2$                                                           | CoNet   | 0.049          | 0.041 | 0.047 |
|                                                                            | CPNT    | 0.046          | 0.044 | 0.050 |
| $x_k = \sin x_l$                                                           | CoNet   | 0.048          | 0.040 | 0.047 |
|                                                                            | CPNT    | 0.041          | 0.043 | 0.049 |
| $x_k = \sin^2 x_l$                                                         | CoNet   | 0.047          | 0.037 | 0.048 |
|                                                                            | CPNT    | 0.042          | 0.043 | 0.050 |
| <b>Scenario 2 : Both node and edge change with node hanging on edge</b>    |         |                |       |       |
| Correlation patterns                                                       | Methods | Censoring rate |       |       |
|                                                                            |         | 0.1            | 0.3   | 0.5   |
| $x_k = 0.5x_l$                                                             | CoNet   | 0.046          | 0.058 | 0.061 |
|                                                                            | CPNT    | 0.045          | 0.060 | 0.056 |
| $x_k = 0.1x_l^2$                                                           | CoNet   | 0.045          | 0.041 | 0.064 |
|                                                                            | CPNT    | 0.044          | 0.044 | 0.064 |
| $x_k = \sin x_l$                                                           | CoNet   | 0.041          | 0.043 | 0.067 |
|                                                                            | CPNT    | 0.031          | 0.049 | 0.064 |
| $x_k = \sin^2 x_l$                                                         | CoNet   | 0.037          | 0.049 | 0.062 |
|                                                                            | CPNT    | 0.032          | 0.049 | 0.062 |
| <b>Scenario 3: Both node and edge change with node not hanging on edge</b> |         |                |       |       |
| Correlation patterns                                                       | Methods | Censoring rate |       |       |
|                                                                            |         | 0.1            | 0.3   | 0.5   |
| $x_k = 0.5x_l$                                                             | CoNet   | 0.054          | 0.049 | 0.049 |
|                                                                            | CPNT    | 0.051          | 0.049 | 0.042 |
| $x_k = 0.1x_l^2$                                                           | CoNet   | 0.049          | 0.047 | 0.058 |
|                                                                            | CPNT    | 0.045          | 0.045 | 0.060 |
| $x_k = \sin x_l$                                                           | CoNet   | 0.046          | 0.054 | 0.060 |
|                                                                            | CPNT    | 0.049          | 0.050 | 0.060 |
| $x_k = \sin^2 x_l$                                                         | CoNet   | 0.045          | 0.052 | 0.062 |
|                                                                            | CPNT    | 0.048          | 0.048 | 0.058 |

**Table S18.** The type I error for detecting the effect of the node on the survival phenotype under three scenarios where the effecting node is randomly selected (n=10000), with BSLMM as the gene expression prediction model in TWAS. Simulations were conducted with four different between-node correlation patterns (the recombination of quadratic and sine, sine, quadratic, and linear) and three different censoring rates (0.1, 0.3, and 0.5).

| Scenario 1 :Only node changes                                       |         |                |       |       |
|---------------------------------------------------------------------|---------|----------------|-------|-------|
| Correlation patterns                                                | Methods | Censoring rate |       |       |
|                                                                     |         | 0.1            | 0.3   | 0.5   |
| $x_k = 0.5x_l$                                                      | CoNet   | 0.035          | 0.044 | 0.047 |
|                                                                     | CPNT    | 0.037          | 0.042 | 0.047 |
| $x_k = 0.1x_l^2$                                                    | CoNet   | 0.040          | 0.045 | 0.045 |
|                                                                     | CPNT    | 0.039          | 0.046 | 0.045 |
| $x_k = \sin x_l$                                                    | CoNet   | 0.047          | 0.042 | 0.045 |
|                                                                     | CPNT    | 0.037          | 0.048 | 0.046 |
| $x_k = \sin^2 x_l$                                                  | CoNet   | 0.045          | 0.044 | 0.044 |
|                                                                     | CPNT    | 0.038          | 0.049 | 0.046 |
| Scenario 2 : Both node and edge change with node hanging on edge    |         |                |       |       |
| Correlation patterns                                                | Methods | Censoring rate |       |       |
|                                                                     |         | 0.1            | 0.3   | 0.5   |
| $x_k = 0.5x_l$                                                      | CoNet   | 0.039          | 0.051 | 0.051 |
|                                                                     | CPNT    | 0.037          | 0.050 | 0.048 |
| $x_k = 0.1x_l^2$                                                    | CoNet   | 0.046          | 0.042 | 0.047 |
|                                                                     | CPNT    | 0.042          | 0.039 | 0.042 |
| $x_k = \sin x_l$                                                    | CoNet   | 0.042          | 0.039 | 0.049 |
|                                                                     | CPNT    | 0.038          | 0.039 | 0.043 |
| $x_k = \sin^2 x_l$                                                  | CoNet   | 0.043          | 0.037 | 0.040 |
|                                                                     | CPNT    | 0.038          | 0.039 | 0.043 |
| Scenario 3: Both node and edge change with node not hanging on edge |         |                |       |       |
| Correlation patterns                                                | Methods | Censoring rate |       |       |
|                                                                     |         | 0.1            | 0.3   | 0.5   |
| $x_k = 0.5x_l$                                                      | CoNet   | 0.044          | 0.046 | 0.044 |
|                                                                     | CPNT    | 0.043          | 0.047 | 0.042 |
| $x_k = 0.1x_l^2$                                                    | CoNet   | 0.039          | 0.042 | 0.038 |
|                                                                     | CPNT    | 0.037          | 0.042 | 0.039 |
| $x_k = \sin x_l$                                                    | CoNet   | 0.034          | 0.041 | 0.037 |
|                                                                     | CPNT    | 0.033          | 0.042 | 0.040 |
| $x_k = \sin^2 x_l$                                                  | CoNet   | 0.034          | 0.043 | 0.039 |
|                                                                     | CPNT    | 0.033          | 0.042 | 0.039 |

**Table S19.** The type I error for detecting the effect of the node on the survival phenotype under three scenarios where the effecting node is randomly selected (n=20000), with BSLMM as the gene expression prediction model in TWAS. Simulations were conducted with four different between-node correlation patterns (the recombination of quadratic and sine, sine, quadratic, and linear) and three different censoring rates (0.1, 0.3, and 0.5).

| <b>Scenario 1 :Only node changes</b>                                       |         |                |       |       |
|----------------------------------------------------------------------------|---------|----------------|-------|-------|
| Correlation patterns                                                       | Methods | Censoring rate |       |       |
|                                                                            |         | 0.1            | 0.3   | 0.5   |
| $x_k = 0.5x_l$                                                             | CoNet   | 0.043          | 0.040 | 0.039 |
|                                                                            | CPNT    | 0.045          | 0.040 | 0.043 |
| $x_k = 0.1x_l^2$                                                           | CoNet   | 0.055          | 0.055 | 0.049 |
|                                                                            | CPNT    | 0.057          | 0.055 | 0.050 |
| $x_k = \sin x_l$                                                           | CoNet   | 0.040          | 0.053 | 0.048 |
|                                                                            | CPNT    | 0.042          | 0.051 | 0.050 |
| $x_k = \sin^2 x_l$                                                         | CoNet   | 0.040          | 0.052 | 0.051 |
|                                                                            | CPNT    | 0.044          | 0.051 | 0.051 |
| <b>Scenario 2 : Both node and edge change with node hanging on edge</b>    |         |                |       |       |
| Correlation patterns                                                       | Methods | Censoring rate |       |       |
|                                                                            |         | 0.1            | 0.3   | 0.5   |
| $x_k = 0.5x_l$                                                             | CoNet   | 0.051          | 0.039 | 0.052 |
|                                                                            | CPNT    | 0.046          | 0.042 | 0.049 |
| $x_k = 0.1x_l^2$                                                           | CoNet   | 0.025          | 0.034 | 0.036 |
|                                                                            | CPNT    | 0.032          | 0.036 | 0.036 |
| $x_k = \sin x_l$                                                           | CoNet   | 0.029          | 0.036 | 0.037 |
|                                                                            | CPNT    | 0.028          | 0.036 | 0.035 |
| $x_k = \sin^2 x_l$                                                         | CoNet   | 0.029          | 0.037 | 0.037 |
|                                                                            | CPNT    | 0.028          | 0.035 | 0.035 |
| <b>Scenario 3: Both node and edge change with node not hanging on edge</b> |         |                |       |       |
| Correlation patterns                                                       | Methods | Censoring rate |       |       |
|                                                                            |         | 0.1            | 0.3   | 0.5   |
| $x_k = 0.5x_l$                                                             | CoNet   | 0.036          | 0.040 | 0.041 |
|                                                                            | CPNT    | 0.041          | 0.044 | 0.044 |
| $x_k = 0.1x_l^2$                                                           | CoNet   | 0.062          | 0.050 | 0.060 |
|                                                                            | CPNT    | 0.063          | 0.055 | 0.060 |
| $x_k = \sin x_l$                                                           | CoNet   | 0.060          | 0.056 | 0.061 |
|                                                                            | CPNT    | 0.059          | 0.057 | 0.060 |
| $x_k = \sin^2 x_l$                                                         | CoNet   | 0.058          | 0.056 | 0.060 |
|                                                                            | CPNT    | 0.059          | 0.054 | 0.060 |

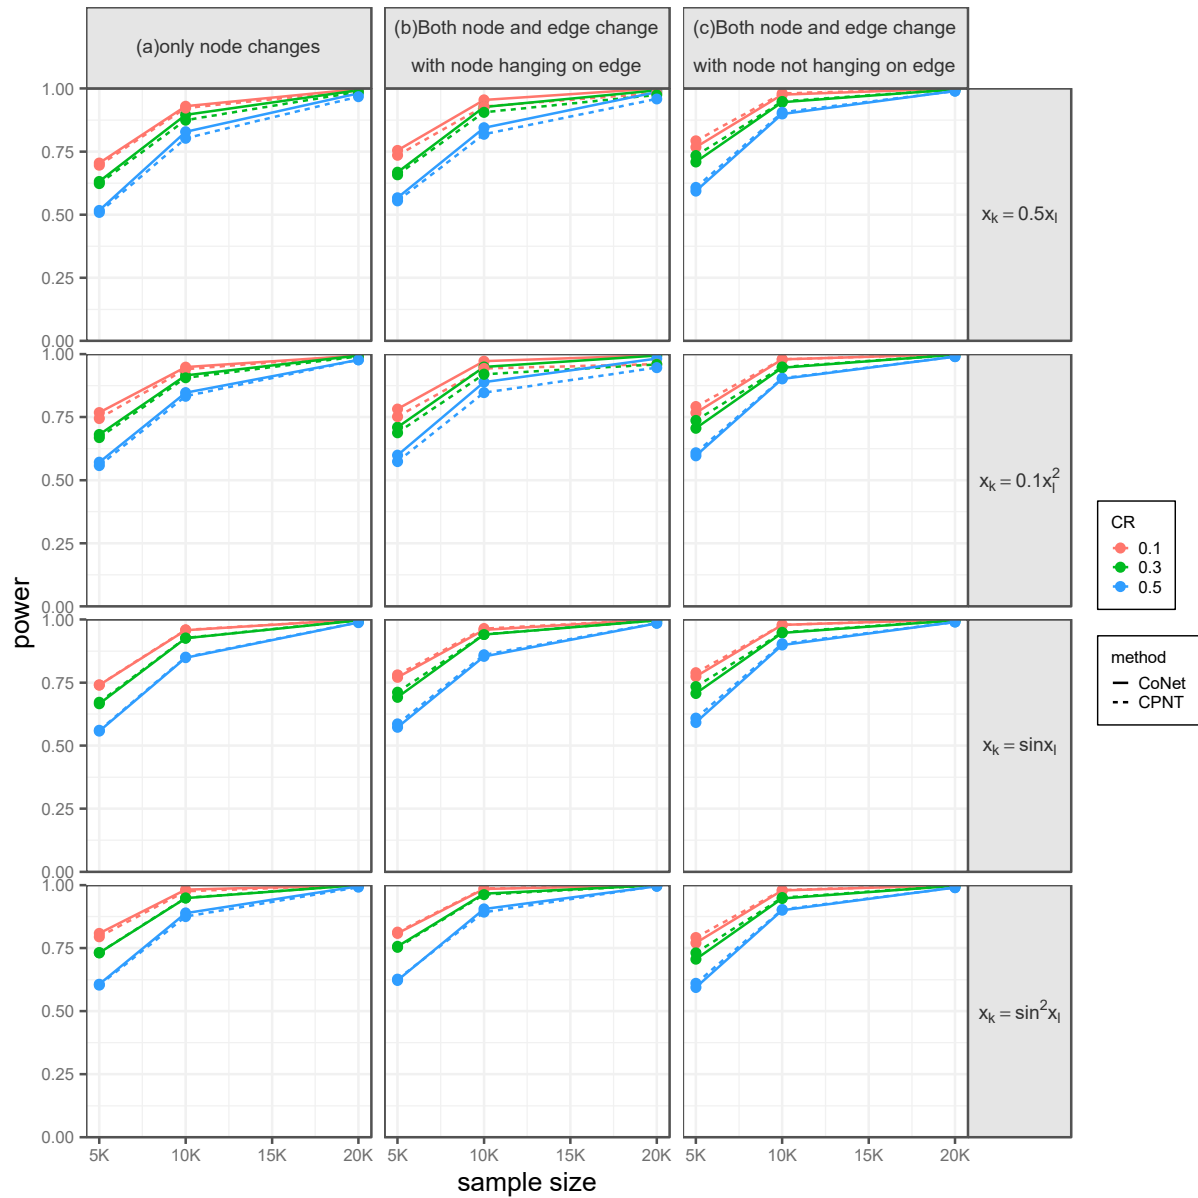

**Figure S5.** The power for detecting the effect of the node on the survival phenotype under the setting that the effecting node is randomly selected, with BSLMM as the gene expression prediction model in TWAS. Simulations were conducted with four different between-node correlation patterns (the recombination of quadratic and sine, sine, quadratic, and linear) and three different censoring rates (0.1, 0.3, and 0.5): (a) Only a node has an effect; (b) Both node and edge have effects, with the effecting node hanging on the edge; (c) Both node and edge have effects, with the effecting node not hanging on the edge.



**Table S20.** The type I error for detecting the effect of the edge on the survival phenotype under three scenarios where the effecting edge is randomly selected (n=5000), with BSLMM as the gene expression prediction model in TWAS. Simulations were conducted with four different between-node correlation patterns (the recombination of quadratic and sine, sine, quadratic, and linear) and three different censoring rates (0.1, 0.3, and 0.5).

| <b>Scenario 1 :Only edge changes</b>                                       |         |                |       |       |
|----------------------------------------------------------------------------|---------|----------------|-------|-------|
| Correlation patterns                                                       | Methods | Censoring rate |       |       |
|                                                                            |         | 0.1            | 0.3   | 0.5   |
| $x_k = 0.5x_l$                                                             | CoNet   | 0.048          | 0.062 | 0.058 |
|                                                                            | CPNT    | 0.048          | 0.059 | 0.052 |
| $x_k = 0.1x_l^2$                                                           | CoNet   | 0.050          | 0.057 | 0.048 |
|                                                                            | CPNT    | 0.058          | 0.051 | 0.051 |
| $x_k = \sin x_l$                                                           | CoNet   | 0.043          | 0.051 | 0.046 |
|                                                                            | CPNT    | 0.052          | 0.052 | 0.055 |
| $x_k = \sin^2 x_l$                                                         | CoNet   | 0.051          | 0.051 | 0.050 |
|                                                                            | CPNT    | 0.052          | 0.048 | 0.050 |
| <b>Scenario 2 : Both node and edge change with node hanging on edge</b>    |         |                |       |       |
| Correlation patterns                                                       | Methods | Censoring rate |       |       |
|                                                                            |         | 0.1            | 0.3   | 0.5   |
| $x_k = 0.5x_l$                                                             | CoNet   | 0.041          | 0.056 | 0.061 |
|                                                                            | CPNT    | 0.051          | 0.041 | 0.052 |
| $x_k = 0.1x_l^2$                                                           | CoNet   | 0.046          | 0.046 | 0.049 |
|                                                                            | CPNT    | 0.052          | 0.053 | 0.049 |
| $x_k = \sin x_l$                                                           | CoNet   | 0.042          | 0.050 | 0.051 |
|                                                                            | CPNT    | 0.046          | 0.050 | 0.046 |
| $x_k = \sin^2 x_l$                                                         | CoNet   | 0.044          | 0.050 | 0.048 |
|                                                                            | CPNT    | 0.049          | 0.052 | 0.045 |
| <b>Scenario 3: Both node and edge change with node not hanging on edge</b> |         |                |       |       |
| Correlation patterns                                                       | Methods | Censoring rate |       |       |
|                                                                            |         | 0.1            | 0.3   | 0.5   |
| $x_k = 0.5x_l$                                                             | CoNet   | 0.043          | 0.045 | 0.046 |
|                                                                            | CPNT    | 0.043          | 0.050 | 0.051 |
| $x_k = 0.1x_l^2$                                                           | CoNet   | 0.056          | 0.053 | 0.054 |
|                                                                            | CPNT    | 0.048          | 0.048 | 0.042 |
| $x_k = \sin x_l$                                                           | CoNet   | 0.038          | 0.046 | 0.053 |
|                                                                            | CPNT    | 0.037          | 0.047 | 0.046 |
| $x_k = \sin^2 x_l$                                                         | CoNet   | 0.038          | 0.042 | 0.052 |
|                                                                            | CPNT    | 0.033          | 0.046 | 0.043 |

**Table S21.** The type I error for detecting the effect of the edge on the survival phenotype under three scenarios where the effecting edge is randomly selected (n=10000), with BSLMM as the gene expression prediction model in TWAS. Simulations were conducted with four different between-node correlation patterns (the recombination of quadratic and sine, sine, quadratic, and linear) and three different censoring rates (0.1, 0.3, and 0.5).

| <b>Scenario 1 :Only edge changes</b>                                       |         |                |       |       |
|----------------------------------------------------------------------------|---------|----------------|-------|-------|
| Correlation patterns                                                       | Methods | Censoring rate |       |       |
|                                                                            |         | 0.1            | 0.3   | 0.5   |
| $x_k = 0.5x_l$                                                             | CoNet   | 0.027          | 0.042 | 0.038 |
|                                                                            | CPNT    | 0.048          | 0.056 | 0.057 |
| $x_k = 0.1x_l^2$                                                           | CoNet   | 0.050          | 0.048 | 0.042 |
|                                                                            | CPNT    | 0.046          | 0.044 | 0.054 |
| $x_k = \sin x_l$                                                           | CoNet   | 0.047          | 0.051 | 0.044 |
|                                                                            | CPNT    | 0.051          | 0.051 | 0.054 |
| $x_k = \sin^2 x_l$                                                         | CoNet   | 0.042          | 0.043 | 0.040 |
|                                                                            | CPNT    | 0.044          | 0.045 | 0.051 |
| <b>Scenario 2 : Both node and edge change with node hanging on edge</b>    |         |                |       |       |
| Correlation patterns                                                       | Methods | Censoring rate |       |       |
|                                                                            |         | 0.1            | 0.3   | 0.5   |
| $x_k = 0.5x_l$                                                             | CoNet   | 0.049          | 0.055 | 0.050 |
|                                                                            | CPNT    | 0.054          | 0.058 | 0.047 |
| $x_k = 0.1x_l^2$                                                           | CoNet   | 0.045          | 0.037 | 0.051 |
|                                                                            | CPNT    | 0.061          | 0.059 | 0.060 |
| $x_k = \sin x_l$                                                           | CoNet   | 0.047          | 0.044 | 0.042 |
|                                                                            | CPNT    | 0.056          | 0.055 | 0.056 |
| $x_k = \sin^2 x_l$                                                         | CoNet   | 0.045          | 0.040 | 0.045 |
|                                                                            | CPNT    | 0.057          | 0.056 | 0.058 |
| <b>Scenario 3: Both node and edge change with node not hanging on edge</b> |         |                |       |       |
| Correlation patterns                                                       | Methods | Censoring rate |       |       |
|                                                                            |         | 0.1            | 0.3   | 0.5   |
| $x_k = 0.5x_l$                                                             | CoNet   | 0.040          | 0.061 | 0.056 |
|                                                                            | CPNT    | 0.040          | 0.042 | 0.040 |
| $x_k = 0.1x_l^2$                                                           | CoNet   | 0.049          | 0.045 | 0.048 |
|                                                                            | CPNT    | 0.046          | 0.048 | 0.047 |
| $x_k = \sin x_l$                                                           | CoNet   | 0.040          | 0.052 | 0.043 |
|                                                                            | CPNT    | 0.037          | 0.046 | 0.050 |
| $x_k = \sin^2 x_l$                                                         | CoNet   | 0.036          | 0.045 | 0.043 |
|                                                                            | CPNT    | 0.043          | 0.053 | 0.052 |

**Table S22.** The type I error for detecting the effect of the edge on the survival phenotype under three scenarios where the effecting edge is randomly selected (n=20000), with BSLMM as the gene expression prediction model in TWAS. Simulations were conducted with four different between-node correlation patterns (the recombination of quadratic and sine, sine, quadratic, and linear) and three different censoring rates (0.1, 0.3, and 0.5).

| <b>Scenario 1 :Only edge changes</b>                                       |         |                |       |       |
|----------------------------------------------------------------------------|---------|----------------|-------|-------|
| Correlation patterns                                                       | Methods | Censoring rate |       |       |
|                                                                            |         | 0.1            | 0.3   | 0.5   |
| $x_k = 0.5x_l$                                                             | CoNet   | 0.052          | 0.051 | 0.059 |
|                                                                            | CPNT    | 0.036          | 0.036 | 0.040 |
| $x_k = 0.1x_l^2$                                                           | CoNet   | 0.049          | 0.049 | 0.044 |
|                                                                            | CPNT    | 0.041          | 0.047 | 0.056 |
| $x_k = \sin x_l$                                                           | CoNet   | 0.051          | 0.051 | 0.049 |
|                                                                            | CPNT    | 0.043          | 0.036 | 0.051 |
| $x_k = \sin^2 x_l$                                                         | CoNet   | 0.042          | 0.047 | 0.048 |
|                                                                            | CPNT    | 0.048          | 0.048 | 0.055 |
| <b>Scenario 2 : Both node and edge change with node hanging on edge</b>    |         |                |       |       |
| Correlation patterns                                                       | Methods | Censoring rate |       |       |
|                                                                            |         | 0.1            | 0.3   | 0.5   |
| $x_k = 0.5x_l$                                                             | CoNet   | 0.045          | 0.047 | 0.052 |
|                                                                            | CPNT    | 0.045          | 0.071 | 0.067 |
| $x_k = 0.1x_l^2$                                                           | CoNet   | 0.045          | 0.049 | 0.048 |
|                                                                            | CPNT    | 0.051          | 0.040 | 0.047 |
| $x_k = \sin x_l$                                                           | CoNet   | 0.041          | 0.056 | 0.058 |
|                                                                            | CPNT    | 0.046          | 0.041 | 0.046 |
| $x_k = \sin^2 x_l$                                                         | CoNet   | 0.040          | 0.049 | 0.047 |
|                                                                            | CPNT    | 0.043          | 0.040 | 0.045 |
| <b>Scenario 3: Both node and edge change with node not hanging on edge</b> |         |                |       |       |
| Correlation patterns                                                       | Methods | Censoring rate |       |       |
|                                                                            |         | 0.1            | 0.3   | 0.5   |
| $x_k = 0.5x_l$                                                             | CoNet   | 0.040          | 0.054 | 0.052 |
|                                                                            | CPNT    | 0.045          | 0.050 | 0.055 |
| $x_k = 0.1x_l^2$                                                           | CoNet   | 0.046          | 0.052 | 0.057 |
|                                                                            | CPNT    | 0.054          | 0.052 | 0.066 |
| $x_k = \sin x_l$                                                           | CoNet   | 0.051          | 0.054 | 0.061 |
|                                                                            | CPNT    | 0.052          | 0.057 | 0.065 |
| $x_k = \sin^2 x_l$                                                         | CoNet   | 0.048          | 0.051 | 0.063 |
|                                                                            | CPNT    | 0.044          | 0.049 | 0.063 |

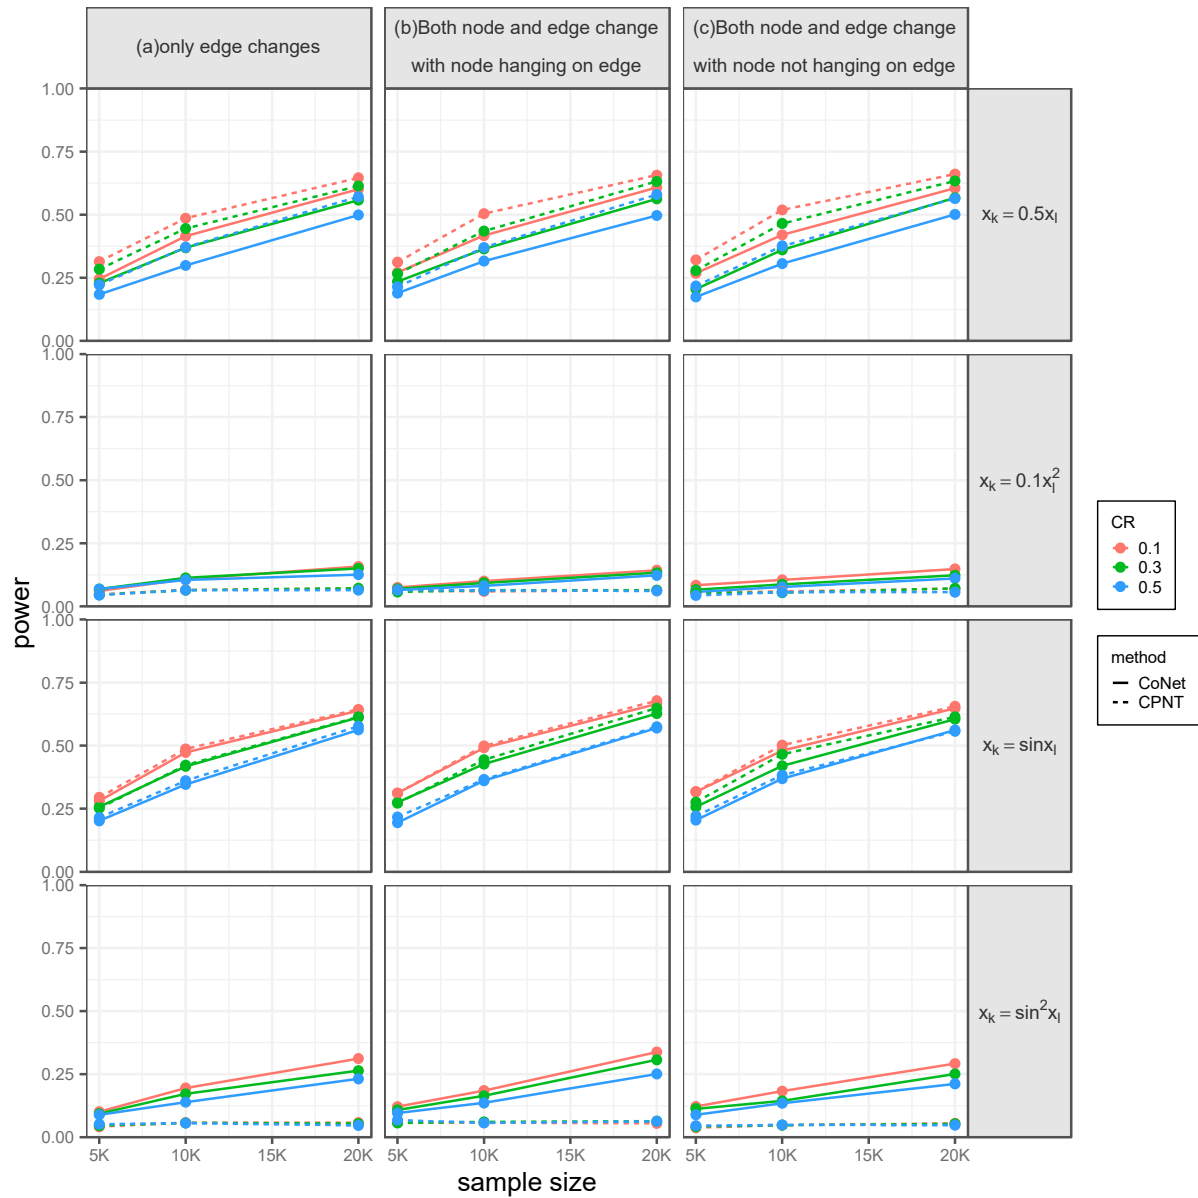

**Figure S6.** The power for detecting the effect of the edge on the survival phenotype under the setting that the effecting edge is randomly selected, with BSLMM as the gene expression prediction model in TWAS. Simulations were conducted with four different between-node correlation patterns (the recombination of quadratic and sine, sine, quadratic, and linear) and three different censoring rates (0.1, 0.3, and 0.5): (a) Only a node has an effect; (b) Both node and edge have effects, with the effecting node hanging on the edge; (c) Both node and edge have effects, with the effecting node not hanging on the edge.

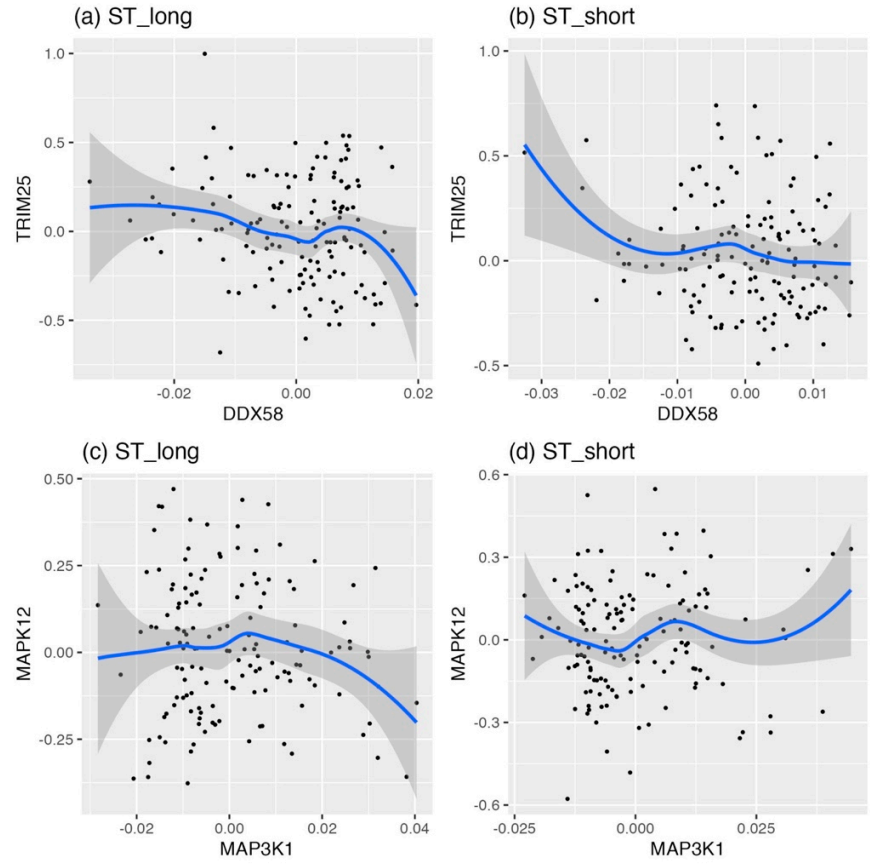

**Figure S7.** Scatter plot of the expression of two different genes with different survival status. The relationship between the expression of DDX58 and TRIM25 under long survival time (a) and short survival time (b). The relationship between the expression of MAP3K1 and MAPK12 under the long survival time (c) and short survival time (d).

**Table S23.** The type I error for testing the effect of the node and edge on the survival phenotype where the effecting nodes and the effecting edges are pre-specified ( $n=5000, 10000, 20000$ ), with SNPs effect obtained from DPR model. Simulations were conducted with two different between-node correlation patterns (linear and the combination of sine and quadratic) and the censoring rate being 0.7.

| Scenario 1: Only node changes |         |             |       |       |
|-------------------------------|---------|-------------|-------|-------|
| Correlation patterns          | Methods | Sample size |       |       |
|                               |         | 5000        | 10000 | 20000 |
| $x_k = 0.5x_l$                | CoNet   | 0.049       | 0.053 | 0.051 |
|                               | CPNT    | 0.050       | 0.054 | 0.056 |
| $x_k = \sin^2 x_l$            | CoNet   | 0.047       | 0.056 | 0.051 |
|                               | CPNT    | 0.050       | 0.054 | 0.054 |
| Scenario 2: Only edge changes |         |             |       |       |
| Correlation patterns          | Methods | Sample size |       |       |
|                               |         | 5000        | 10000 | 20000 |
| $x_k = 0.5x_l$                | CoNet   | 0.048       | 0.052 | 0.058 |
|                               | CPNT    | 0.049       | 0.047 | 0.048 |

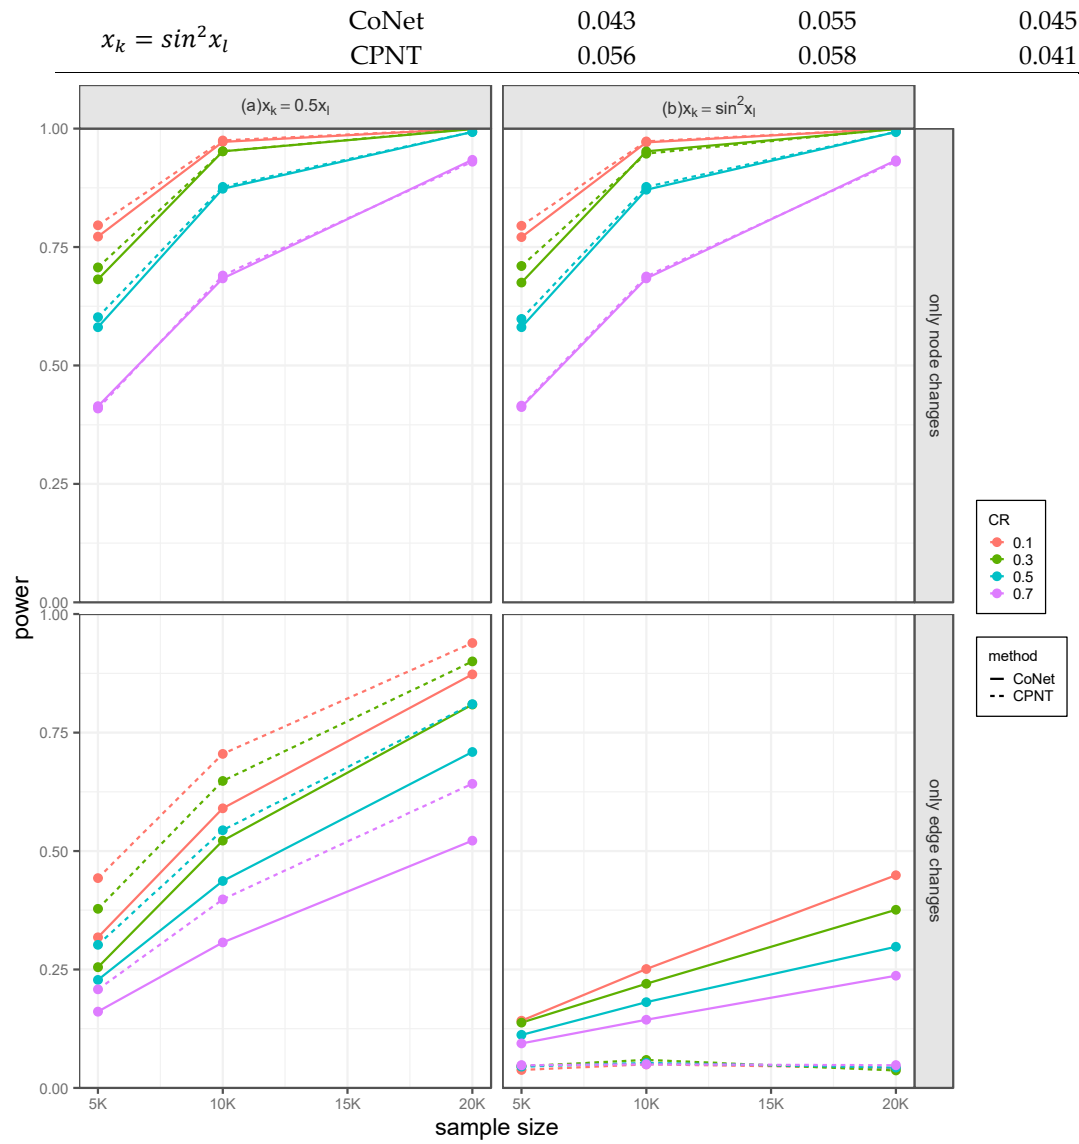

**Figure S8.** The power for testing the effect of the node and edge on the survival phenotype where the effecting nodes and effecting edges are pre-specified ( $n=5000, 10000, 20000$ ), with SNPs effect obtained from DPR model. Simulations were conducted with two different between-node correlation patterns (linear and the combination of sine and quadratic) and four censoring rates (0.1, 0.3, 0.5 and 0.7).

**Table S24.** The type I error for testing the effect of the node and edge on the survival phenotype under three scenarios where the effecting nodes and the effecting edges are randomly selected (n=5000, 10000, 20000), with SNPs effect obtained from DPR model. Simulations were conducted with two different between-node correlation patterns (linear and the combination of sine and quadratic) and the censoring rate being 0.7.

| <b>Scenario 1: Only node changes</b> |         |             |       |       |
|--------------------------------------|---------|-------------|-------|-------|
| Correlation patterns                 | Methods | Sample size |       |       |
|                                      |         | 5000        | 10000 | 20000 |
| $x_k = 0.5x_l$                       | CoNet   | 0.060       | 0.039 | 0.043 |
|                                      | CPNT    | 0.053       | 0.040 | 0.042 |
| $x_k = \sin^2 x_l$                   | CoNet   | 0.059       | 0.039 | 0.043 |
|                                      | CPNT    | 0.053       | 0.040 | 0.044 |
| <b>Scenario 2: Only edge changes</b> |         |             |       |       |
| Correlation patterns                 | Methods | Sample size |       |       |
|                                      |         | 5000        | 10000 | 20000 |
| $x_k = 0.5x_l$                       | CoNet   | 0.054       | 0.048 | 0.052 |
|                                      | CPNT    | 0.041       | 0.054 | 0.044 |
| $x_k = \sin^2 x_l$                   | CoNet   | 0.051       | 0.046 | 0.049 |
|                                      | CPNT    | 0.037       | 0.055 | 0.049 |

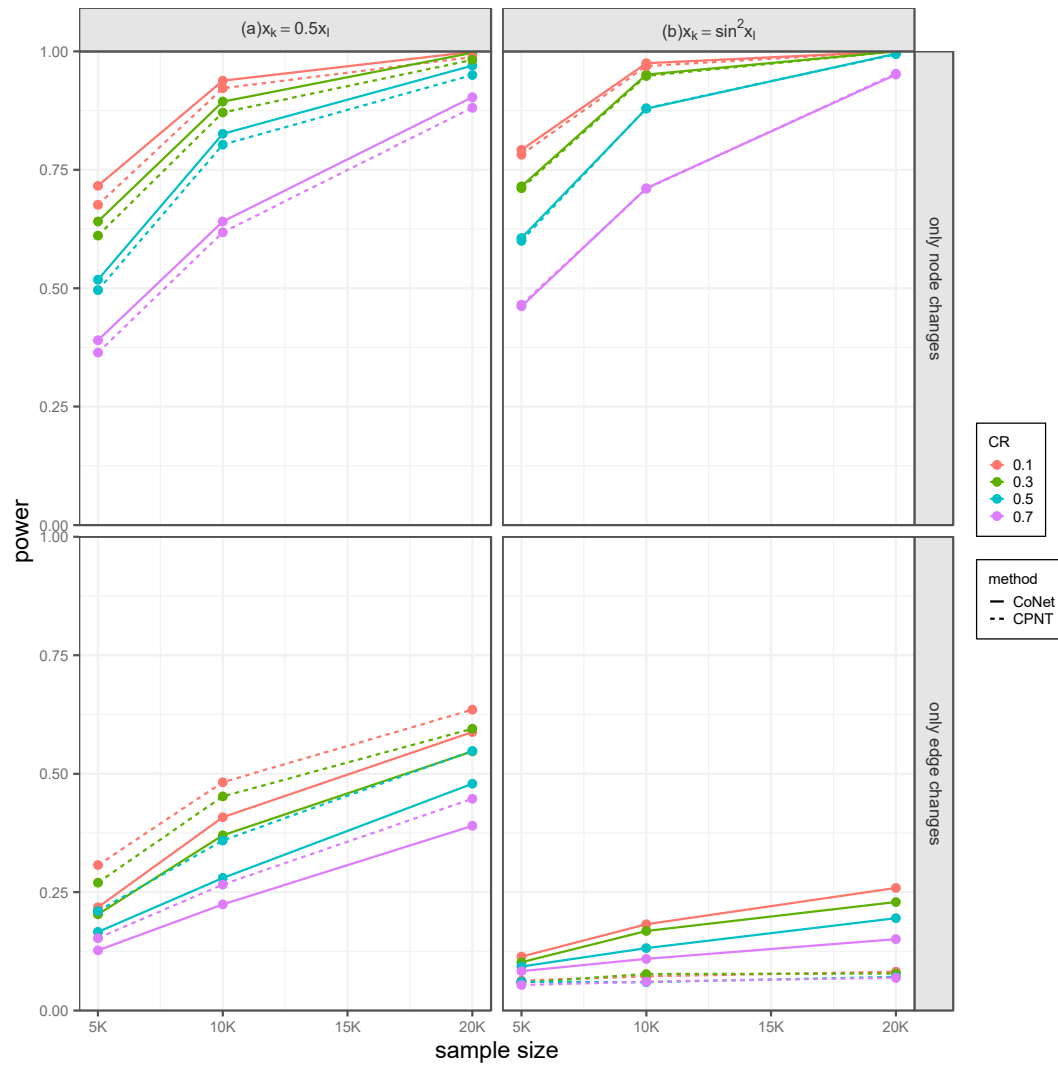

**Figure S9.** The power for testing the effect of the node and edge on the survival phenotype under two scenarios where the effecting nodes and the effecting edges are randomly selected (n=5000, 10000, 20000), with SNPs effect obtained from DPR model. Simulations were conducted with two different between-node correlation patterns (linear and the combination of sine and quadratic) and four censoring rates (0.1, 0.3, 0.5 and 0.7).

**Table S25.** Mean computational time (seconds) of both methods.

| Sample size | CoNet_fix | CPNT_fix | CoNet_random | CPNT_random |
|-------------|-----------|----------|--------------|-------------|
| 5000        | 6.70      | 5.45     | 6.63         | 5.21        |
| 10000       | 8.14      | 7.91     | 7.62         | 7.38        |
| 20000       | 8.28      | 8.08     | 8.03         | 7.89        |
| 300000      | 20.88     | 12.48    | 20.81        | 12.69       |

Computation is carried out on a single thread of an Intel Xeon E5-2697 v3 CPU. The computational time is averaged across 20 replicates and calculated when the effecting nodes and the effecting edges are pre-specified (CoNet\_fix and CPNT\_fix) or



randomly selected(CoNet\_random and CPNT\_random). Both methods have almost the same physical memories (less than 1GB) under various situations.

**Table S26.** Type I error of CoNet in a reduced gene network with some proportions(0, 20%, 30%) of genes being unavailable, where the effecting nodes and effecting edges are pre-specified. Simulations were conducted under sample size 5000 with two different between-node correlation patterns, including linear relationship and nonlinear relationship (the recombination of quadratic and sine relationship) and four different censoring rates (0.1, 0.3, 0.5, 0.7).

| Scenario 1: Only node changes |            |                 |       |       |       |
|-------------------------------|------------|-----------------|-------|-------|-------|
| Correlation patterns          | proportion | Censoring rates |       |       |       |
|                               |            | 0.1             | 0.3   | 0.5   | 0.7   |
| $x_k = 0.5x_l$                | 0          | 0.051           | 0.050 | 0.046 | 0.049 |
|                               | 20%        | 0.050           | 0.064 | 0.061 | 0.057 |
|                               | 30%        | 0.035           | 0.044 | 0.049 | 0.044 |
| $x_k = \sin^2 x_l$            | 0          | 0.037           | 0.045 | 0.043 | 0.042 |
|                               | 20%        | 0.051           | 0.051 | 0.046 | 0.038 |
|                               | 30%        | 0.034           | 0.045 | 0.041 | 0.045 |
| Scenario 2: Only edge changes |            |                 |       |       |       |
| Correlation patterns          | proportion | Censoring rates |       |       |       |
|                               |            | 0.1             | 0.3   | 0.5   | 0.7   |
| $x_k = 0.5x_l$                | 0          | 0.049           | 0.039 | 0.043 | 0.048 |
|                               | 20%        | 0.053           | 0.053 | 0.051 | 0.057 |
|                               | 30%        | 0.041           | 0.056 | 0.049 | 0.044 |
| $x_k = \sin^2 x_l$            | 0          | 0.050           | 0.050 | 0.042 | 0.043 |
|                               | 20%        | 0.051           | 0.051 | 0.046 | 0.038 |
|                               | 30%        | 0.048           | 0.054 | 0.045 | 0.041 |

**Table S27.** Type I error of CoNet in a reduced gene network with some proportions(0, 20%, 30%) of genes being unavailable, where the effecting nodes and effecting edges are pre-specified. Simulations were conducted under sample size 10000 with two different between-node correlation patterns, including linear relationship and nonlinear relationship (the recombination of quadratic and sine relationship) and four different censoring rates (0.1, 0.3, 0.5, 0.7).

| Scenario 1: Only node changes |            |                 |       |       |       |
|-------------------------------|------------|-----------------|-------|-------|-------|
| Correlation patterns          | proportion | Censoring rates |       |       |       |
|                               |            | 0.1             | 0.3   | 0.5   | 0.7   |
| $x_k = 0.5x_l$                | 0          | 0.047           | 0.052 | 0.057 | 0.053 |
|                               | 20%        | 0.054           | 0.056 | 0.049 | 0.060 |
|                               | 30%        | 0.058           | 0.049 | 0.053 | 0.050 |
| $x_k = \sin^2 x_l$            | 0          | 0.042           | 0.050 | 0.061 | 0.043 |
|                               | 20%        | 0.054           | 0.051 | 0.048 | 0.046 |
|                               | 30%        | 0.044           | 0.049 | 0.059 | 0.053 |
| Scenario 2: Only edge changes |            |                 |       |       |       |
| Correlation patterns          | proportion | Censoring rates |       |       |       |
|                               |            | 0.1             | 0.3   | 0.5   | 0.7   |
| $x_k = 0.5x_l$                | 0          | 0.040           | 0.040 | 0.030 | 0.052 |

|                    |     |       |       |       |       |
|--------------------|-----|-------|-------|-------|-------|
| $x_k = \sin^2 x_l$ | 20% | 0.046 | 0.045 | 0.055 | 0.055 |
|                    | 30% | 0.060 | 0.060 | 0.053 | 0.057 |
|                    | 0   | 0.062 | 0.058 | 0.069 | 0.055 |
|                    | 20% | 0.054 | 0.051 | 0.048 | 0.046 |
|                    | 30% | 0.066 | 0.056 | 0.067 | 0.051 |

**Table S28.** Type I error of CoNet in a reduced gene network with some proportions(0, 20%, 30%) of genes being unavailable, where the effecting nodes and effecting edges are pre-specified. Simulations were conducted under sample size 20000 with two different between-node correlation patterns, including linear relationship and nonlinear relationship (the recombination of quadratic and sine relationship) and four different censoring rates (0.1, 0.3, 0.5, 0.7).

| Scenario 1: Only node changes |            |                 |       |       |       |
|-------------------------------|------------|-----------------|-------|-------|-------|
| Correlation patterns          | proportion | Censoring rates |       |       |       |
|                               |            | 0.1             | 0.3   | 0.5   | 0.7   |
| $x_k = 0.5x_l$                | 0          | 0.051           | 0.055 | 0.048 | 0.051 |
|                               | 20%        | 0.055           | 0.046 | 0.047 | 0.046 |
|                               | 30%        | 0.056           | 0.055 | 0.049 | 0.050 |
| $x_k = \sin^2 x_l$            | 0          | 0.055           | 0.057 | 0.053 | 0.045 |
|                               | 20%        | 0.051           | 0.048 | 0.050 | 0.045 |
|                               | 30%        | 0.056           | 0.056 | 0.051 | 0.051 |
| Scenario 2: Only edge changes |            |                 |       |       |       |
| Correlation patterns          | proportion | Censoring rates |       |       |       |
|                               |            | 0.1             | 0.3   | 0.5   | 0.7   |
| $x_k = 0.5x_l$                | 0          | 0.052           | 0.053 | 0.060 | 0.058 |
|                               | 20%        | 0.055           | 0.057 | 0.049 | 0.051 |
|                               | 30%        | 0.058           | 0.056 | 0.049 | 0.059 |
| $x_k = \sin^2 x_l$            | 0          | 0.046           | 0.049 | 0.045 | 0.045 |
|                               | 20%        | 0.051           | 0.048 | 0.050 | 0.045 |
|                               | 30%        | 0.040           | 0.045 | 0.050 | 0.051 |

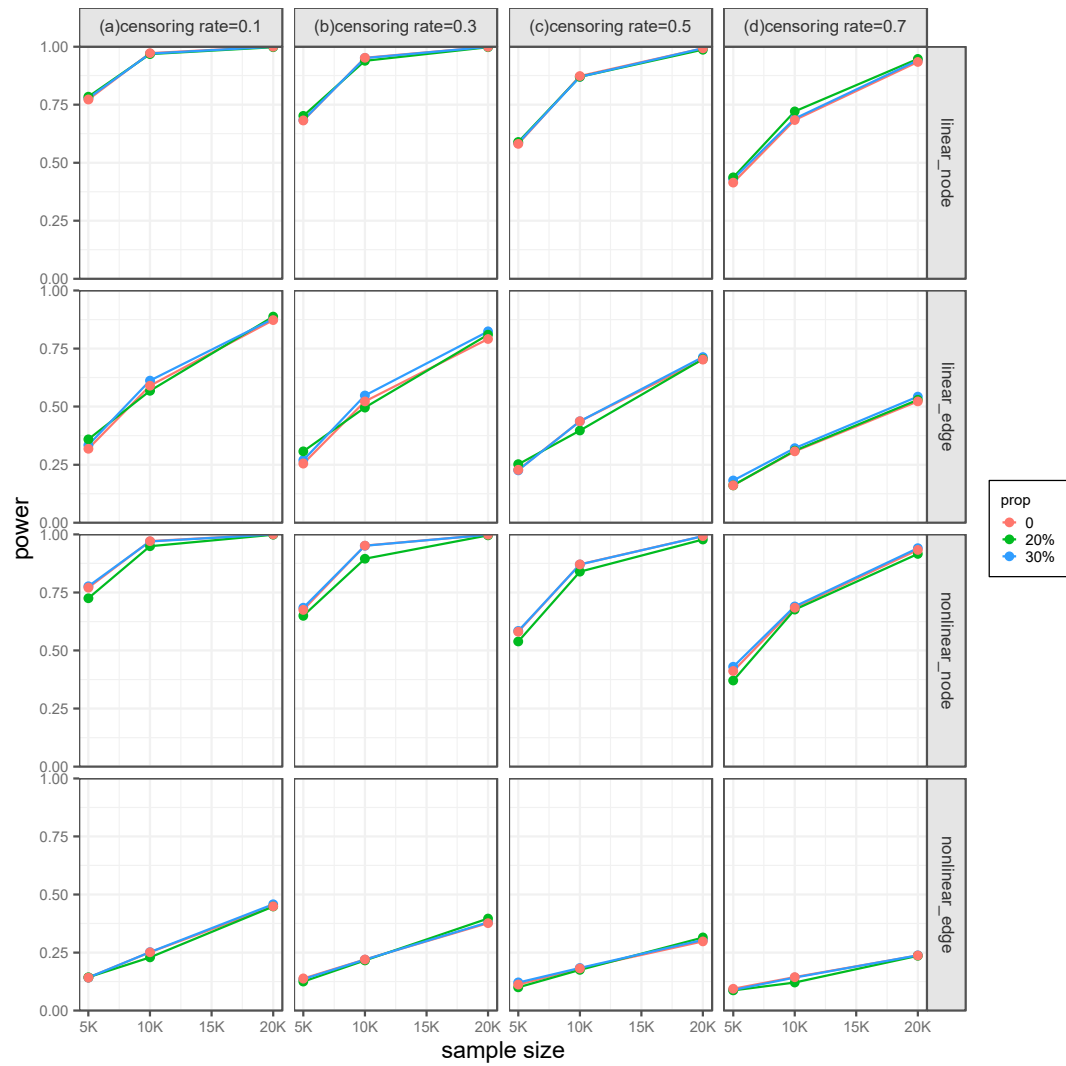

**Figure S10.** Power of CoNet in a reduced gene network with some genes being unavailable, where the effecting nodes and effecting edges are pre-specified. Power (y-axis) at a significance level 0.05 is plotted against different sample size (x-axis). The proportions of “20%” and “30%” represent 20% and 30% genes are unavailable in network, “0” means the genes are all available. Various settings are displayed from top to bottom, including the power for detecting the effect of node and the effect of edge in linear relationship as well as in nonlinear (the recombination of quadratic and sine relationship) relationship. Different censoring rates are listed from left to right, including (a) 0.1, (b) 0.3, (c) 0.5 and (d) 0.7.

**Table S29.** Type I error of CoNet in a reduced gene network with some proportions(0, 20%, 30%) of genes being unavailable, where the effecting nodes and effecting edges are randomly selected. Simulations were conducted under sample size 5000 with two different between-node correlation patterns, including linear relationship and nonlinear relationship (the recombination of quadratic and sine relationship) and four different censoring rates (0.1, 0.3, 0.5, 0.7).

| Scenario 1: Only node changes |            |                 |       |       |       |
|-------------------------------|------------|-----------------|-------|-------|-------|
| Correlation patterns          | proportion | Censoring rates |       |       |       |
|                               |            | 0.1             | 0.3   | 0.5   | 0.7   |
| $x_k = 0.5x_l$                | 0          | 0.049           | 0.054 | 0.047 | 0.041 |
|                               | 20%        | 0.054           | 0.051 | 0.054 | 0.053 |
|                               | 30%        | 0.062           | 0.060 | 0.057 | 0.051 |
| $x_k = \sin^2 x_l$            | 0          | 0.046           | 0.052 | 0.048 | 0.037 |
|                               | 20%        | 0.058           | 0.054 | 0.055 | 0.053 |
|                               | 30%        | 0.060           | 0.058 | 0.062 | 0.053 |
| Scenario 2: Only edge changes |            |                 |       |       |       |
| Correlation patterns          | proportion | Censoring rates |       |       |       |
|                               |            | 0.1             | 0.3   | 0.5   | 0.7   |
| $x_k = 0.5x_l$                | 0          | 0.041           | 0.043 | 0.053 | 0.054 |
|                               | 20%        | 0.072           | 0.058 | 0.059 | 0.054 |
|                               | 30%        | 0.048           | 0.050 | 0.059 | 0.060 |
| $x_k = \sin^2 x_l$            | 0          | 0.039           | 0.051 | 0.048 | 0.051 |
|                               | 20%        | 0.071           | 0.063 | 0.054 | 0.054 |
|                               | 30%        | 0.047           | 0.049 | 0.058 | 0.056 |

**Table S30.** Type I error of CoNet in a reduced gene network with some proportions(0, 20%, 30%) of genes being unavailable, where the effecting nodes and effecting edges are randomly selected. Simulations were conducted under sample size 10000 with two different between-node correlation patterns, including linear relationship and nonlinear relationship (the recombination of quadratic and sine relationship) and four different censoring rates (0.1, 0.3, 0.5, 0.7).

| Scenario 1: Only node changes |            |                 |       |       |       |
|-------------------------------|------------|-----------------|-------|-------|-------|
| Correlation patterns          | proportion | Censoring rates |       |       |       |
|                               |            | 0.1             | 0.3   | 0.5   | 0.7   |
| $x_k = 0.5x_l$                | 0          | 0.036           | 0.047 | 0.054 | 0.048 |
|                               | 20%        | 0.053           | 0.053 | 0.057 | 0.058 |
|                               | 30%        | 0.049           | 0.050 | 0.054 | 0.059 |
| $x_k = \sin^2 x_l$            | 0          | 0.062           | 0.044 | 0.035 | 0.055 |
|                               | 20%        | 0.054           | 0.050 | 0.054 | 0.057 |
|                               | 30%        | 0.051           | 0.051 | 0.054 | 0.059 |
| Scenario 2: Only edge changes |            |                 |       |       |       |
| Correlation patterns          | proportion | Censoring rates |       |       |       |
|                               |            | 0.1             | 0.3   | 0.5   | 0.7   |
| $x_k = 0.5x_l$                | 0          | 0.047           | 0.058 | 0.068 | 0.048 |
|                               | 20%        | 0.040           | 0.042 | 0.053 | 0.049 |
|                               | 30%        | 0.046           | 0.036 | 0.050 | 0.038 |
| $x_k = \sin^2 x_l$            | 0          | 0.028           | 0.045 | 0.047 | 0.046 |

|     |       |       |       |       |
|-----|-------|-------|-------|-------|
| 20% | 0.045 | 0.045 | 0.045 | 0.049 |
| 30% | 0.058 | 0.044 | 0.048 | 0.040 |

**Table S31.** Type I error of CoNet in a reduced gene network with some proportions(0, 20%, 30%) of genes being unavailable, where the effecting nodes and effecting edges are randomly selected. Simulations were conducted under sample size 20000 with two different between-node correlation patterns, including linear relationship and nonlinear relationship (the recombination of quadratic and sine relationship) and four different censoring rates (0.1, 0.3, 0.5, 0.7).

| Scenario 1: Only node changes |            |                 |       |       |       |
|-------------------------------|------------|-----------------|-------|-------|-------|
| Correlation patterns          | proportion | Censoring rates |       |       |       |
|                               |            | 0.1             | 0.3   | 0.5   | 0.7   |
| $x_k = 0.5x_l$                | 0          | 0.056           | 0.056 | 0.053 | 0.052 |
|                               | 20%        | 0.045           | 0.059 | 0.055 | 0.045 |
|                               | 30%        | 0.059           | 0.051 | 0.059 | 0.047 |
| $x_k = \sin^2 x_l$            | 0          | 0.047           | 0.061 | 0.048 | 0.049 |
|                               | 20%        | 0.047           | 0.060 | 0.056 | 0.046 |
|                               | 30%        | 0.057           | 0.061 | 0.058 | 0.044 |
| Scenario 2: Only edge changes |            |                 |       |       |       |
| Correlation patterns          | proportion | Censoring rates |       |       |       |
|                               |            | 0.1             | 0.3   | 0.5   | 0.7   |
| $x_k = 0.5x_l$                | 0          | 0.035           | 0.042 | 0.040 | 0.052 |
|                               | 20%        | 0.048           | 0.048 | 0.042 | 0.057 |
|                               | 30%        | 0.048           | 0.051 | 0.052 | 0.047 |
| $x_k = \sin^2 x_l$            | 0          | 0.049           | 0.052 | 0.050 | 0.049 |
|                               | 20%        | 0.048           | 0.044 | 0.044 | 0.055 |
|                               | 30%        | 0.047           | 0.045 | 0.049 | 0.045 |

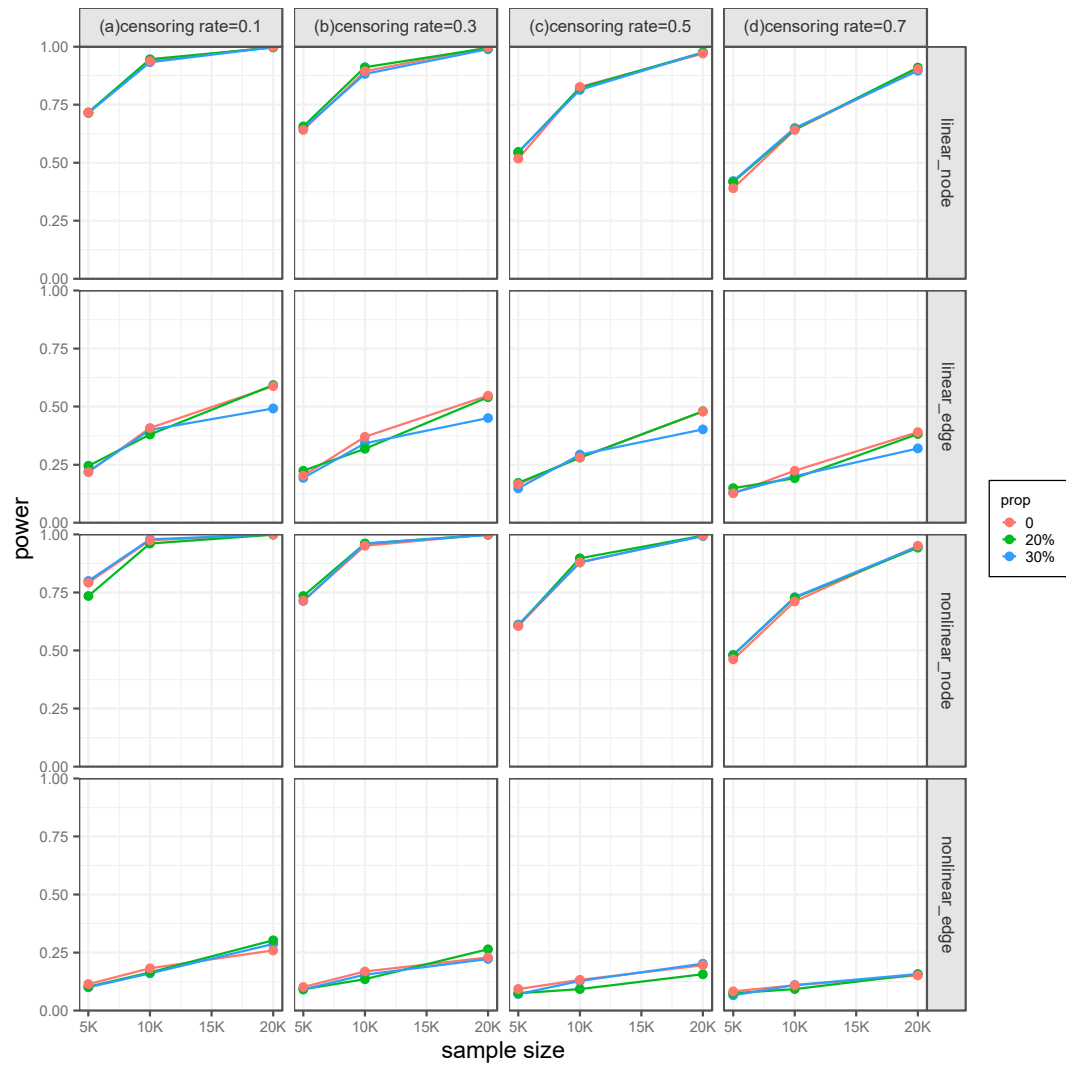

**Figure S11.** Power of CoNet in a reduced gene network with some genes being unavailable, where the effecting nodes and effecting edges are randomly selected. Power (y-axis) at a significance level 0.05 is plotted against different sample size (x-axis). The proportions of “20%” and “30%” represent 20% and 30% genes are unavailable in network, “0” means the genes are all available. Various settings are displayed from top to bottom, including the power for detecting the effect of node and the effect of edge in linear relationship as well as in nonlinear (the recombination of quadratic and sine relationship) relationship. Different censoring rates are listed from left to right, including (a) 0.1, (b) 0.3, (c) 0.5 and (d) 0.7.

**Table S32.** Type I error of CoNet and TIGAR to test the effect of nodes under the survival phenotype. Simulations were conducted with four different between-node correlation patterns (the combination of sine and quadratic, sine, quadratic, and linear) and three different censoring rates (0.1, 0.3, and 0.5).

| sample size=5000     |         |                |       |       |
|----------------------|---------|----------------|-------|-------|
| Correlation patterns | Methods | Censoring rate |       |       |
|                      |         | 0.1            | 0.3   | 0.5   |
| $x_k = 0.5x_l$       | CoNet   | 0.051          | 0.050 | 0.046 |
|                      | TIGAR   | 0.058          | 0.048 | 0.059 |
| $x_k = \sin x_l$     | CoNet   | 0.037          | 0.047 | 0.043 |
|                      | TIGAR   | 0.038          | 0.042 | 0.048 |
| sample size=10000    |         |                |       |       |
| Correlation patterns | Methods | Censoring rate |       |       |
|                      |         | 0.1            | 0.3   | 0.5   |
| $x_k = 0.5x_l$       | CoNet   | 0.048          | 0.048 | 0.046 |
|                      | TIGAR   | 0.045          | 0.050 | 0.046 |
| $x_k = \sin x_l$     | CoNet   | 0.054          | 0.053 | 0.057 |
|                      | TIGAR   | 0.059          | 0.048 | 0.053 |
| sample size=20000    |         |                |       |       |
| Correlation patterns | Methods | Censoring rate |       |       |
|                      |         | 0.1            | 0.3   | 0.5   |
| $x_k = 0.5x_l$       | CoNet   | 0.054          | 0.060 | 0.051 |
|                      | TIGAR   | 0.036          | 0.052 | 0.038 |
| $x_k = \sin x_l$     | CoNet   | 0.050          | 0.053 | 0.055 |
|                      | TIGAR   | 0.059          | 0.049 | 0.052 |

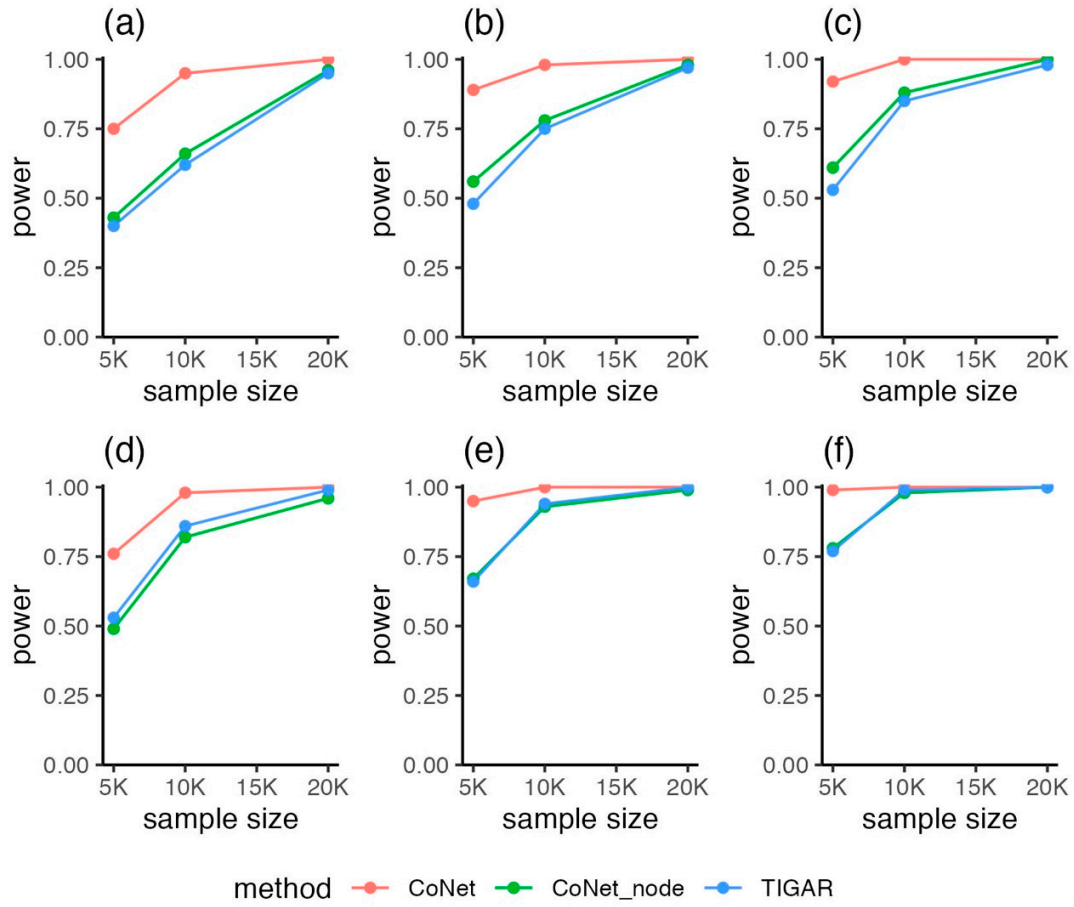

**Figure S12.** Power of CoNet and TIGAR to test the effect of nodes under the effect size of between-node correlation being 0.1. Power (y-axis) at a significance level 0.05 is plotted against different sample size (x-axis). “CoNet” and “CoNet\_node” represent that CoNet tests the entire network and CoNet only tests nodes, respectively. The power with linear between-node correlation is shown under censoring rate 0.5 (a), 0.3 (b) and 0.1(c). The power with nonlinear between-node correlation (sine relationship) is shown under censoring rate 0.5 (d), 0.3 (e) and 0.1 (f).
